# Supplementary material for: The Alteration of Nasopharyngeal and Oropharyngeal Microbiota in Children with MPP and Non-MPP
Source: Genes (Basel). 2017 Dec 11;8(12):380. doi: 10.3390/genes8120380 (PMC5748698; doi:10.3390/genes8120380)
Supplement: Supplementary file 1 [file genes-08-00380-s001.xlsx]

## Sheet: Supplementary Table S1
Sample ID	Pneumonia(P)/ Health(H)	Age(year)	Gender	Feed pattern	Delivery mode	Family history of allergy	History of pneumonia	Asthma	Lung consolidation, atelectasis, infiltration	Hospitalization Time(days)	Fever(≥37.5 ℃)	Cough	Wheezing	CRP(<0.499mg/l)	PCT(<0.5ng/ml)	Eosinophil(0.5–5%)	Pathogens Detection	Antibiotics Treatment
P1	P	0.2	Male	Breast feed	Vaginally born	-	-	-	Y	12	-	Y	-	Y	Y	Y	S. aureus	Ceftriaxone Sodium
P2	P	0.3	Male	Breast feed	Vaginally born	-	Y	-	Y	9	Y	Y	-	-	Y	Y	Unknown	Erythromycin + Azithromycin
P3	P	0.3	Female	Milk feed	Cesarean section	-	-	-	Y	15	-	Y	Y	Y	Y	Y	H. parainfluenzae	Sulbactam Sodium Amoxicillin Sodium + Azithromycin
P4	P	0.3	Male	Breast feed	Vaginally born	-	-	-	Y	7	-	Y	Y	-	Y	Y	S. pneumoniae	Sulbactam Sodium Amoxicillin Sodium
P5	P	0.4	Male	Milk feed	Vaginally born	-	-	-	Y	8	-	Y	Y	Y	Y	-	S. pneumoniae+EBV	Sulbactam Sodium Amoxicillin Sodium
P6	P	0.4	Male	Breast feed	Cesarean section	-	-	-	Y	10	-	Y	Y	-	Y	-	S. pneumoniae	Erythromycin Estolate
P7	P	0.5	Male	Milk feed	Vaginally born	-	-	-	Y	9	-	Y	Y	-	Y	-	M. pneumoniae+CMV	Cefoperazone Sodium and Sulbactam Sodium + Erythromycin
P8	P	0.5	Male	Milk feed	Vaginally born	-	-	-	Y	4	-	Y	Y	Y	Y	Y	S. pneumoniae+H1N1	Ceftriaxone Sodium + Mezlocillin
P9	P	0.5	Male	Breast feed + Milk feed	Cesarean section	-	-	-	Y	5	-	Y	Y	Y	Y	Y	H. influenzae+C. pneumoniae	Sulbactam Sodium Amoxicillin Sodium
P10	P	0.6	Male	Breast feed	Vaginally born	-	-	-	Y	6	-	Y	Y	-	Y	-	H. parainfluenzae+RSV	Amoxicillin + Erythromycin
P11	P	0.7	Male	Breast feed	Cesarean section	Y	Y	-	Y	9	-	Y	Y	-	Y	-	S. pneumoniae+CMV	Sulbactam Sodium Amoxicillin Sodium + Amoxicillin and Clavulanate Potassium
P12	P	0.7	Male	Breast feed + Milk feed	Vaginally born	-	-	-	Y	5	-	Y	-	Y	Y	Y	M. pneumoniae+RSV	Azithromycin
P13	P	0.8	Female	Breast feed	Vaginally born	-	-	-	Y	9	-	Y	-	-	Y	-	H. parainfluenzae	Piperacillin Sodium and Tazobactam Sodium + Sulfamethoxazole + Voriconazole + Azithromycin
P14	P	0.8	Male	Breast feed	Vaginally born	-	-	-	Y	8	Y	Y	-	-	Y	Y	EBV	Fusidic acid
P15	P	0.8	Male	Breast feed	Vaginally born	-	Y	-	Y	9	-	Y	-	Y	Y	Y	M. pneumoniae+S. pneumoniae	Sulbactam Sodium Amoxicillin Sodium
P16	P	0.9	Male	Milk feed	Vaginally born	-	-	-	Y	8	Y	Y	Y	-	Y	-	S. pneumoniae+M. catarrhalis+EBV	Cefuroxime
P17	P	1.3	Female	Breast feed	Cesarean section	-	-	-	Y	7	-	Y	-	-	Y	Y	CMV	Erythromycin
P18	P	1.3	Female	Breast feed	Vaginally born	-	-	-	Y	17	-	Y	Y	-	Y	Y	Unknown	Ceftriaxone Sodium + Vancomycin + Cefixime
P19	P	1.4	Female	Breast feed	Cesarean section	-	-	-	Y	7	-	Y	-	-	Y	-	Unknown	Sulbactam Sodium Amoxicillin Sodium
P20	P	1.7	Male	Milk feed	Vaginally born	-	-	-	Y	2	-	Y	-	-	Y	Y	Unknown	No antibiotics
P21	P	1.8	Male	Milk feed	Vaginally born	-	-	-	Y	11	Y	Y	-	-	Y	-	M. pneumoniae+C. pneumoniae+AdV	Azithromycin + Cefoperazone Sodium and Sulbactam Sodium + Sulbactam Sodium Amoxicillin Sodium
P22	P	1.8	Male	Breast feed + Milk feed	Cesarean section	-	-	-	Y	7	Y	Y	-	-	Y	Y	M. pneumoniae	Erythromycin + Piperacillin Sodium and Tazobactam Sodium + Acyclovir
P23	P	1.8	Male	Breast feed	Vaginally born	-	Y	-	Y	11	Y	Y	Y	-	Y	-	M. pneumoniae+S. pneumoniae+C. pneumoniae+GAS+EBV	Erythromycin + Amoxicillin and Clavulanate Potassium + Azithromycin
P24	P	1.8	Male	Breast feed	Vaginally born	-	-	-	Y	13	Y	Y	Y	Y	Y	-	EBV	Azithromycin
P25	P	1.8	Female	Breast feed	Cesarean section	-	-	-	Y	12	Y	Y	-	Y	Y	Y	M. pneumoniae+S. pneumoniae	Cephalosporins + Erythromycin
P26	P	1.9	Female	Breast feed	Vaginally born	-	Y	-	Y	16	Y	-	-	Y	Y	Y	S. aureus+EBV	Cefuroxime + Cefoperazone Sodium and Sulbactam Sodium + Acyclovir
P27	P	2	Female	Breast feed	Cesarean section	-	-	-	Y	6	-	Y	-	Y	Y	Y	M. pneumoniae+H. influenzae+S. pneumoniae	Amoxicillin and Clavulanate Potassium
P28	P	2.3	Female	Milk feed	Cesarean section	-	-	-	Y	12	Y	Y	-	-	Y	-	M. pneumoniae+S. aureus+A. baumannii+GAS	Amoxicillin and Clavulanate Potassium + Erythromycin + Sulbactam Sodium Amoxicillin Sodium + Erythromycin
P29	P	2.6	Male	Breast feed	Vaginally born	-	-	-	Y	5	-	Y	Y	Y	Y	Y	M. pneumoniae	Erythromycin + Azithromycin
P30	P	2.7	Male	Breast feed	Vaginally born	-	-	-	Y	21	-	Y	Y	Y	Y	Y	EBV	Azithromycin
P31	P	2.9	Male	Breast feed	Cesarean section	-	Y	-	Y	12	-	Y	-	-	Y	Y	M. catarrhalis	Erythromycin + Ceftriaxone Sodium
P32	P	2.9	Male	Breast feed	Vaginally born	-	-	-	Y	12	Y	Y	-	-	Y	Y	M. pneumoniae	Cefoperazone Sodium and Sulbactam Sodium + Erythromycin + Azithromycin
P33	P	3.4	Male	Milk feed	Cesarean section	-	Y	-	Y	37	Y	Y	-	-	Y	-	M. pneumoniae	Erythromycin + Ceftriaxone Sodium + Meropenem + Piperacillin Sodium and Tazobactam Sodium + Cefixime + Sulbactam Sodium Amoxicillin Sodium + Azithromycin + Oseltamivir
P34	P	3.5	Male	Breast feed	Vaginally born	-	Y	-	Y	10	Y	Y	-	-	Y	Y	M. pneumoniae+S. pneumoniae	Erythromycin + Azithromycin
P35	P	3.8	Female	Breast feed	Cesarean section	-	Y	-	Y	16	Y	Y	-	-	Y	Y	M. pneumoniae+EBV	Azithromycin
P36	P	3.9	Female	Breast feed	Vaginally born	-	-	-	Y	9	Y	Y	-	-	Y	-	M. pneumoniae	Ceftriaxone Sodium + Azithromycin
P37	P	3.9	Male	Breast feed	Cesarean section	-	-	-	Y	9	-	Y	-	Y	Y	-	C. pneumoniae	Sulbactam Sodium Amoxicillin Sodium
P38	P	4	Female	Breast feed	Vaginally born	-	-	-	Y	8	-	Y	-	Y	Y	Y	Unknown	Sulbactam Sodium Amoxicillin Sodium + Azithromycin
P39	P	4.2	Female	Breast feed	Vaginally born	-	-	-	Y	10	-	-	-	Y	Y	-	M. catarrhalis	Mezlocillin Sodium and Sulbactam Sodium
P40	P	4.3	Female	Milk feed	Cesarean section	-	-	-	Y	11	Y	Y	Y	-	Y	-	M. pneumoniae+C. pneumoniae	Azithromycin + Acyclovir
P41	P	4.3	Female	Breast feed + Milk feed	Vaginally born	-	-	-	Y	8	Y	Y	-	-	Y	Y	M. pneumoniae+C. pneumoniae	Cefoperazone Sodium and Sulbactam Sodium + Erythromycin
P42	P	4.3	Male	Breast feed	Vaginally born	-	-	-	Y	10	Y	-	-	-	Y	-	M. pneumoniae+S. haemolyticus+EBV	Azithromycin + Vancomycin + Mezlocillin Sodium and Sulbactam Sodium
P43	P	4.3	Male	Breast feed	Cesarean section	-	Y	-	Y	13	Y	Y	-	-	Y	-	M. pneumoniae	Ceftriaxone Sodium + Sulbactam Sodium Amoxicillin Sodium + Cefoperazone Sodium and Sulbactam Sodium—Azithromycin
P44	P	4.4	Male	Breast feed	Vaginally born	-	-	-	Y	7	Y	Y	-	-	Y	-	M. pneumoniae+C. pneumoniae+EBV	Sulbactam Sodium Amoxicillin Sodium + Azithromycin
P45	P	4.4	Male	Breast feed	Vaginally born	-	-	-	Y	5	Y	Y	-	-	Y	Y	M. pneumoniae+M. catarrhalis+EBV	Azithromycin
P46	P	4.8	Male	Breast feed	Cesarean section	-	Y	-	Y	5	-	Y	-	Y	Y	Y	M. catarrhalis	No antibiotics
P47	P	4.9	Male	Breast feed	Cesarean section	-	-	-	Y	4	-	Y	-	-	Y	Y	EBV	Cephalosporins + Azithromycin
P48	P	5.3	Male	Breast feed	Vaginally born	-	-	-	Y	7	-	Y	-	Y	Y	Y	M. pneumoniae	Azithromycin + Mezlocillin
P49	P	6.5	Male	Breast feed	Cesarean section	-	-	-	Y	4	-	Y	-	-	Y	-	Unknown	Erythromycin + Ceftriaxone Sodium
P50	P	6.6	Male	Breast feed + Milk feed	Vaginally born	-	-	-	Y	11	Y	Y	-	-	Y	Y	M. pneumoniae+EBV	Azithromycin
P51	P	7.6	Male	Breast feed + Milk feed	Cesarean section	-	-	-	Y	9	Y	Y	-	-	Y	-	M. pneumoniae+H. influenzae	Erythromycin
P52	P	7.7	Male	Milk feed	Vaginally born	-	-	-	Y	7	-	Y	-	Y	Y	-	M. pneumoniae+EBV	Azithromycin
P53	P	8.7	Female	Milk feed	Cesarean section	-	-	-	Y	16	Y	Y	-	-	Y	-	M. pneumoniae+EBV	Cefoperazone Sodium and Sulbactam Sodium + Erythromycin + Azithromycin
P54	P	9.5	Male	Milk feed	Vaginally born	-	-	-	Y	5	Y	Y	-	-	Y	Y	M. pneumoniae+EBV	Erythromycin
P55	P	10.2	Male	Breast feed	Vaginally born	-	-	-	Y	5	-	Y	-	-	Y	Y	Unknown	Cefixime
P56	P	10.5	Male	Breast feed	Cesarean section	-	-	-	Y	8	-	Y	-	-	Y	Y	M. pneumoniae	Cefprozil + Azithromycin + Cefoperazone Sodium and Sulbactam Sodium
P57	P	10.5	Female	Milk feed	Vaginally born	-	-	-	Y	13	Y	Y	-	-	Y	-	M. pneumoniae+C. pneumoniae+EBV	Azithromycin + Sulbactam Sodium Amoxicillin Sodium
P58	P	10.8	Male	Breast feed	Vaginally born	-	-	-	Y	7	-	Y	-	Y	Y	-	EBV	Azithromycin + Sulbactam Sodium Amoxicillin Sodium
P59	P	11.9	Female	Breast feed	Vaginally born	-	Y	-	Y	15	-	Y	-	-	Y	-	H. influenzae+S. pneumoniae	Ceftriaxone Sodium
P60	P	12.7	Female	Breast feed	Vaginally born	-	-	-	Y	8	-	Y	-	Y	Y	Y	H. influenzae	Sulbactam Sodium Amoxicillin Sodium
H1	H	0.1	Male	Breast feed + Milk feed	Vaginally born	-	-	-	NA	-	-	-	-	NA	NA	NA	NA	NA
H2	H	0.3	Female	Breast feed + Milk feed	Vaginally born	-	-	-	NA	-	-	-	-	NA	NA	NA	NA	NA
H3	H	0.3	Female	Breast feed + Milk feed	Vaginally born	-	-	-	NA	-	-	-	-	NA	NA	NA	NA	NA
H4	H	0.4	Female	Milk feed	Cesarean section	-	-	-	NA	-	-	-	-	NA	NA	NA	NA	NA
H5	H	0.4	Female	Breast feed + Milk feed	Vaginally born	-	-	-	NA	-	-	-	-	NA	NA	NA	NA	NA
H6	H	0.4	Female	Breast feed + Milk feed	Vaginally born	-	-	-	NA	-	-	-	-	NA	NA	NA	NA	NA
H7	H	0.5	Male	Breast feed + Milk feed	Vaginally born	-	-	-	NA	-	-	-	-	NA	NA	NA	NA	NA
H8	H	0.5	Male	Breast feed + Milk feed	Vaginally born	-	-	-	NA	-	-	-	-	NA	NA	NA	NA	NA
H9	H	0.6	Male	Breast feed + Milk feed	Vaginally born	-	-	-	NA	-	-	-	-	NA	NA	NA	NA	NA
H10	H	0.6	Male	Breast feed + Milk feed	Cesarean section	-	-	-	NA	-	-	-	-	NA	NA	NA	NA	NA
H11	H	1	Female	Breast feed	Vaginally born	-	-	-	NA	-	-	-	-	NA	NA	NA	NA	NA
H12	H	1	Female	Breast feed	Vaginally born	-	-	-	NA	-	-	-	-	NA	NA	NA	NA	NA
H13	H	1.1	Female	Breast feed + Milk feed	Cesarean section	-	-	-	NA	-	-	-	-	NA	NA	NA	NA	NA
H14	H	1.2	Female	Breast feed + Milk feed	Vaginally born	-	-	-	NA	-	-	-	-	NA	NA	NA	NA	NA
H15	H	1.3	Male	Breast feed	Vaginally born	-	-	-	NA	-	-	-	-	NA	NA	NA	NA	NA
H16	H	1.4	Male	Milk feed	Vaginally born	-	-	-	NA	-	-	-	-	NA	NA	NA	NA	NA
H17	H	1.5	Female	Milk feed	Vaginally born	-	-	-	NA	-	-	-	-	NA	NA	NA	NA	NA
H18	H	1.5	Male	Breast feed + Milk feed	Vaginally born	-	-	-	NA	-	-	-	-	NA	NA	NA	NA	NA
H19	H	1.5	Male	Breast feed	Cesarean section	-	-	-	NA	-	-	-	-	NA	NA	NA	NA	NA
H20	H	1.6	Male	Breast feed	Cesarean section	-	-	-	NA	-	-	-	-	NA	NA	NA	NA	NA
H21	H	1.7	Male	Milk feed	Vaginally born	-	-	-	NA	-	-	-	-	NA	NA	NA	NA	NA
H22	H	1.7	Male	Breast feed + Milk feed	Vaginally born	-	-	-	NA	-	-	-	-	NA	NA	NA	NA	NA
H23	H	1.7	Male	Breast feed + Milk feed	Cesarean section	-	-	-	NA	-	-	-	-	NA	NA	NA	NA	NA
H24	H	1.8	Male	Breast feed	Cesarean section	-	-	-	NA	-	-	-	-	NA	NA	NA	NA	NA
H25	H	2.4	Female	Breast feed + Milk feed	Vaginally born	-	-	-	NA	-	-	-	-	NA	NA	NA	NA	NA
H26	H	2.5	Male	Breast feed + Milk feed	Cesarean section	-	-	-	NA	-	-	-	-	NA	NA	NA	NA	NA
H27	H	2.6	Female	Breast feed + Milk feed	Vaginally born	-	-	-	NA	-	-	-	-	NA	NA	NA	NA	NA
H28	H	2.7	Male	Breast feed	Vaginally born	-	-	-	NA	-	-	-	-	NA	NA	NA	NA	NA
H29	H	2.8	Female	Breast feed + Milk feed	Cesarean section	-	-	-	NA	-	-	-	-	NA	NA	NA	NA	NA
H30	H	2.8	Female	Breast feed + Milk feed	Cesarean section	-	-	-	NA	-	-	-	-	NA	NA	NA	NA	NA
H31	H	2.9	Female	Breast feed	Cesarean section	-	-	-	NA	-	-	-	-	NA	NA	NA	NA	NA
H32	H	2.9	Female	Breast feed	Cesarean section	-	-	-	NA	-	-	-	-	NA	NA	NA	NA	NA
H33	H	2.9	Male	Breast feed + Milk feed	Cesarean section	-	-	-	NA	-	-	-	-	NA	NA	NA	NA	NA
H34	H	2.9	Female	Breast feed + Milk feed	Cesarean section	-	-	-	NA	-	-	-	-	NA	NA	NA	NA	NA
H35	H	3.2	Female	Breast feed	Vaginally born	-	-	-	NA	-	-	-	-	NA	NA	NA	NA	NA
H36	H	3.4	Female	Milk feed	Vaginally born	-	-	-	NA	-	-	-	-	NA	NA	NA	NA	NA
H37	H	3.5	Male	Milk feed	Vaginally born	-	-	-	NA	-	-	-	-	NA	NA	NA	NA	NA
H38	H	3.8	Male	Breast feed + Milk feed	Vaginally born	-	-	-	NA	-	-	-	-	NA	NA	NA	NA	NA
H39	H	3.9	Female	Milk feed	Vaginally born	-	-	-	NA	-	-	-	-	NA	NA	NA	NA	NA
H40	H	3.9	Male	Breast feed	Vaginally born	-	-	-	NA	-	-	-	-	NA	NA	NA	NA	NA
H41	H	3.9	Female	Breast feed	Vaginally born	-	-	-	NA	-	-	-	-	NA	NA	NA	NA	NA
H42	H	4.3	Female	Breast feed	Cesarean section	-	-	-	NA	-	-	-	-	NA	NA	NA	NA	NA
H43	H	4.4	Female	Breast feed + Milk feed	Cesarean section	-	-	-	NA	-	-	-	-	NA	NA	NA	NA	NA
H44	H	4.5	Female	Milk feed	Vaginally born	-	-	-	NA	-	-	-	-	NA	NA	NA	NA	NA
H45	H	4.9	Male	Breast feed	Vaginally born	-	-	-	NA	-	-	-	-	NA	NA	NA	NA	NA
H46	H	5.1	Female	Breast feed + Milk feed	Vaginally born	-	-	-	NA	-	-	-	-	NA	NA	NA	NA	NA
H47	H	5.2	Female	Breast feed + Milk feed	Vaginally born	-	-	-	NA	-	-	-	-	NA	NA	NA	NA	NA
H48	H	5.6	Male	Breast feed + Milk feed	Vaginally born	-	-	-	NA	-	-	-	-	NA	NA	NA	NA	NA
H49	H	6.1	Female	Breast feed + Milk feed	Vaginally born	-	-	-	NA	-	-	-	-	NA	NA	NA	NA	NA
H50	H	6.8	Female	Breast feed	Cesarean section	-	-	-	NA	-	-	-	-	NA	NA	NA	NA	NA
H51	H	6.8	Female	Breast feed + Milk feed	Cesarean section	-	-	-	NA	-	-	-	-	NA	NA	NA	NA	NA
H52	H	7.3	Female	Milk feed	Vaginally born	-	-	-	NA	-	-	-	-	NA	NA	NA	NA	NA
H53	H	7.3	Male	Breast feed + Milk feed	Vaginally born	-	-	-	NA	-	-	-	-	NA	NA	NA	NA	NA
H54	H	7.6	Male	Breast feed + Milk feed	Vaginally born	-	-	-	NA	-	-	-	-	NA	NA	NA	NA	NA
H55	H	7.8	Female	Breast feed	Vaginally born	-	-	-	NA	-	-	-	-	NA	NA	NA	NA	NA
H56	H	8.8	Female	Breast feed + Milk feed	Vaginally born	-	-	-	NA	-	-	-	-	NA	NA	NA	NA	NA
H57	H	8.9	Female	Breast feed	Cesarean section	-	-	-	NA	-	-	-	-	NA	NA	NA	NA	NA
H58	H	9	Male	Milk feed	Vaginally born	-	-	-	NA	-	-	-	-	NA	NA	NA	NA	NA
H59	H	9.9	Male	Breast feed	Cesarean section	-	-	-	NA	-	-	-	-	NA	NA	NA	NA	NA
"-" represents no detected; "NA" represents not available;

## Sheet: Supplementary Table S2
Factor	Nasopharynx	Oropharynx
Pneumonia onset	***<0.001	***<0.001
Age	0.218	(**)0.006
Gender	0.114	0.517
Feed.pattern	0.437	0.522
Delivery.mode	0.626	0.63
*** means significance(P.value < 0.001),**means significance(P.value < 0.01)

## Sheet: Supplementary Table S3
Phylum	OP-H		OP-P		p.value	q.value		Phylum	NP-H		NP-P		p.value	q.value
	MEAN	SD	MEAN	SD					MEAN	SD	MEAN	SD
Firmicutes	47.0476	19.472	63.5521	22.1623	3.5e-05	0.000105		Firmicutes	43.0643	30.778	72.0862	27.0241	7e-06	2.7e-05
Proteobacteria	18.7402	17.0892	17.3865	22.5723	0.263228	0.332499		Proteobacteria	31.7494	31.7564	18.9856	24.3297	0.039954	0.082981
Actinobacteria	7.66378	6.27568	12.5454	12.7162	0.086516	0.12214		Actinobacteria	12.5631	17.5208	5.7892	8.34085	0.51157	0.575516
Bacteroidetes	19.6372	14.664	5.33518	10.4081	0	0		Unclassified	0.321302	0.55334	1.12634	3.0113	0.239091	0.339761
Tenericutes	0.001387	0.004167	0.427633	1.25094	0	0		Tenericutes	0.043018	0.238582	1.04832	3.82783	0	0
Unclassified	0.014385	0.043894	0.291723	1.21855	0	0		Bacteroidetes	7.54069	11.1656	0.838519	1.71776	1e-06	5e-06
Fusobacteria	6.49483	7.63155	0.228238	0.746543	0	0		Acidobacteria	0.049243	0.142282	0.035484	0.061166	0.000604	0.001631
Candidatus_Saccharibacteria	0.302276	0.437934	0.19103	0.470125	0.006871	0.013742		Fusobacteria	3.91884	10.0542	0.035443	0.048895	0	0
Verrucomicrobia	0.000938	0.005751	0.014316	0.019236	0	0		Verrucomicrobia	0.01567	0.031051	0.020286	0.022306	0.000152	0.000513
Acidobacteria	0.001946	0.010265	0.011679	0.017344	0	0		Candidatus_Saccharibacteria	0.087777	0.157838	0.012276	0.016822	0.086628	0.137586
Spirochaetes	0.01908	0.065443	0.011352	0.049238	0.451477	0.49252		Spirochaetes	0.541841	3.90277	0.005858	0.013074	0.818226	0.818226
SR1	0.074713	0.179593	0.000825	0.006389	0	0		Chlamydiae	0.004759	0.024703	0.004189	0.019442	0.267313	0.360873
Deferribacteres	0	0	0.000726	0.001433	4.6e-05	0.000123		Planctomycetes	0.000459	0.002486	0.002299	0.005167	0.000563	0.001631
Planctomycetes	0	0	0.000724	0.003215	0.003934	0.008583		Lentisphaerae	0.000476	0.002166	0.002204	0.013178	0.745473	0.774145
Gemmatimonadetes	0.000154	0.001186	0.000713	0.00159	0.000997	0.002393		Deferribacteres	0	0	0.00197	0.003825	0	0
Nitrospirae	5.1e-05	0.000396	0.000697	0.00252	0.031651	0.054259		Deinococcus_Thermus	0.05286	0.13105	0.001706	0.002789	0	0
Deinococcus_Thermus	0.000124	0.000951	0.000463	0.001338	0.019488	0.035978		Gemmatimonadetes	0.00113	0.003253	0.001599	0.003502	0.063421	0.122312
Chlamydiae	0	0	0.000188	0.000744	0.045491	0.072786		Chloroflexi	0.013498	0.036656	0.000953	0.004469	0.009052	0.020367
Elusimicrobia	0	0	0.000116	0.000902	0.329647	0.376739		Nitrospirae	0.006612	0.031458	0.000882	0.001989	0.585363	0.632192
Armatimonadetes	0	0	0.000112	0.000492	0.085007	0.12214		Ignavibacteriae	0.000708	0.00414	0.00035	0.001538	0.453298	0.532132
Chloroflexi	0.000135	0.000732	7.9e-05	0.000432	0.966056	0.990478		Armatimonadetes	8.4e-05	0.000642	0.00027	0.000969	0.108497	0.162745
Ignavibacteriae	0	0	7.8e-05	0.000426	0.162602	0.216803		SR1	0.018218	0.042228	3.6e-05	0.000279	0	0
Lentisphaerae	0.000124	0.000951	3.8e-05	0.000298	0.990478	0.990478		Synergistetes	0.002737	0.008077	0	0	0.000939	0.002305
Synergistetes	0.001176	0.009031	0	0	0.321377	0.376739		Thermotogae	0.001695	0.011577	0	0	0.079825	0.134705
								Latescibacteria	0.000725	0.003753	0	0	0.079825	0.134705
								Hydrogenedentes	0.000611	0.00469	0	0	0.321377	0.394417
								candidate_division_WPS	0.000155	0.001189	0	0	0.321377	0.394417

## Sheet: Supplementary Table S4
	NP-H		NP-P		p.value	q.value		Genus	OP-H		OP-P		p.value	q.value
Genus	MEAN	SD	MEAN	SD					MEAN	SD	MEAN	SD
Moraxella	19.4861	29.1617	1.44822	6.38336	0.000108	0.000562		Streptococcus	31.1362	21.3478	33.0036	19.6923	0.402535	0.437802
Staphylococcus	16.8866	32.9897	52.2914	32.4612	0	0		Prevotella	15.8833	15.222	4.35185	10.1243	0	0
Corynebacterium	10.9974	17.5768	3.50811	8.34675	0.001997	0.006902		Neisseria	11.0332	11.9993	0.95284	1.95006	0	0
Streptococcus	10.0405	17.9707	11.9078	18.0173	0.006247	0.018338		Veillonella	8.89131	8.51332	5.24066	6.7882	0.00069	0.002435
Dolosigranulum	8.47818	12.3307	1.40169	7.22363	3.7e-05	0.000213		Haemophilus	6.98972	8.74359	2.66739	6.25779	0.000115	0.000493
Unclassified	4.46964	5.93886	5.47062	5.74712	0.004809	0.014229		Rothia	5.55995	6.38835	3.09096	4.22713	0.004809	0.013632
Prevotella	3.43089	5.91022	0.461073	1.26988	2e-06	1.5e-05		Leptotrichia	4.08046	6.05767	0.205146	0.68113	0	0
Fusobacterium	3.39725	10.0141	0.016795	0.038577	0	0		Granulicatella	2.57781	2.04352	0.179771	0.20509	0	0
Haemophilus	3.35084	12.9356	2.93508	11.787	0.172794	0.256519		Fusobacterium	2.06813	3.09145	0.016126	0.071	0	0
Massilia	1.59669	12.2356	0.007683	0.02206	0.011482	0.030619		Gemella	1.91123	2.20017	0.626876	0.53535	1.3e-05	7e-05
Bacteroides	1.50714	3.36383	0.049848	0.198777	0	0		Porphyromonas	1.81319	2.44802	0.371359	0.96725	2e-06	1.2e-05
Veillonella	1.41523	2.96143	0.868085	0.789884	0.001198	0.004462		Actinomyces	1.49183	1.32094	5.96758	9.4183	0.000524	0.001905
Neisseria	1.23108	2.57138	0.135227	0.149919	0.025772	0.059221		Atopobium	0.428928	0.821172	1.79723	2.83762	0	0
Acinetobacter	0.979415	1.67297	4.1034	12.7896	0.014597	0.036662		Eubacterium	0.394557	0.507357	0.630058	1.21173	0.776139	0.802902
Granulicatella	0.763804	1.7961	0.059996	0.053418	0.082677	0.151124		Lactobacillus	0.369157	1.13962	0.367681	1.6676	0	0
Rothia	0.645131	1.72777	0.518532	0.375735	1.1e-05	7.1e-05		Streptobacillus	0.277113	0.633647	0.005681	0.023735	0	0
Faecalibacterium	0.545847	1.54668	0.013211	0.059528	0	0		Megasphaera	0.203677	0.319667	0.080523	0.146033	0.140582	0.230043
Treponema	0.539569	3.90306	0.004082	0.01191	0.711633	0.760954		Oribacterium	0.195222	0.21393	0.330949	0.548262	0.097769	0.165243
Pseudomonas	0.517016	0.860291	0.092841	0.098429	3.1e-05	0.000183		Corynebacterium	0.163222	0.925545	1.45775	7.05022	0	0
Gemella	0.470008	1.14932	0.336188	0.302167	3e-06	2.2e-05		Peptostreptococcus	0.151439	0.249561	0.093868	0.179065	0.925847	0.946889
Roseburia	0.464873	1.6735	0.014874	0.044986	0	0		Capnocytophaga	0.147784	0.383736	0.040008	0.134721	0.009482	0.023871
Leptotrichia	0.464747	1.01802	0.012855	0.021475	0	0		Alloprevotella	0.127962	0.43762	0.049809	0.175405	0.229372	0.317592
Alloprevotella	0.449997	3.04296	0.007008	0.01332	0.043858	0.091405		Bacteroides	0.118466	0.740251	0.011753	0.029438	0.000199	0.000796
Lactobacillus	0.421651	1.24961	1.04903	2.86508	2.8e-05	0.000168		Moraxella	0.11541	0.35688	0.189555	0.492898	0.086413	0.146739
Actinomyces	0.388058	0.919277	0.673373	0.577728	0	0		Campylobacter	0.109479	0.145453	0.011494	0.019803	0	0
Porphyromonas	0.37693	0.747899	0.050418	0.093441	0.004348	0.012954		Solobacterium	0.108199	0.20117	0.69475	0.849423	0	0
Escherichia	0.339477	0.642455	7.9e-05	0.000432	0	0		Staphylococcus	0.064664	0.348309	13.6196	17.9705	0	0
Campylobacter	0.279498	1.22249	0.004262	0.008917	0.00064	0.002633		Centipeda	0.061252	0.174547	3.7e-05	0.000288	0	0
Ruminococcus	0.272003	0.509599	0.057926	0.323919	0	0		Acinetobacter	0.056121	0.40217	5.69653	17.0719	0	0
Vibrio	0.252107	0.812707	0.011476	0.042755	0.007396	0.020351		Bacillus	0.049522	0.281444	0.805475	5.33201	0	0
Eubacterium	0.250183	0.911195	0.13127	0.167719	0.002886	0.009167		Eikenella	0.048477	0.097499	0.010254	0.037776	4.8e-05	0.000224
Brucella	0.249232	0.466354	0.016405	0.040949	0	0		Faecalibacterium	0.047269	0.294364	0.006765	0.034585	0.738572	0.766242
Cronobacter	0.235328	0.481193	0.000154	0.000581	0	0		Pseudomonas	0.043314	0.318243	0.029094	0.031065	0	0
Luteibacter	0.201308	0.380094	0.000316	0.001185	0	0		Dolosigranulum	0.041677	0.232287	0.231311	0.873703	0	0
Megamonas	0.197331	0.677365	0.000503	0.001359	0	0		Parvimonas	0.036423	0.111407	0.03675	0.162861	0.084575	0.145036
Blautia	0.196925	0.479849	0.027837	0.136707	0	0		Abiotrophia	0.033161	0.04678	1.0853	4.27256	0	0
Rhizobium	0.19136	0.342055	0.008976	0.044227	0	0		Aggregatibacter	0.032347	0.045245	0.002228	0.005497	5e-06	2.9e-05
Parvimonas	0.170896	0.701438	0.0226	0.044192	0.010108	0.027292		Fructobacillus	0.030556	0.166693	0	0	0.079825	0.145036
Atopobium	0.134087	0.594473	0.354052	0.358068	0	0		Catonella	0.030206	0.040544	0.007855	0.015137	0.000303	0.001173
Thauera	0.134024	0.765163	0.000238	0.000844	0.00044	0.001901		Peptococcus	0.026048	0.054604	0.00048	0.001398	2e-06	1.2e-05
Photobacterium	0.119908	0.566733	0.001322	0.003001	0.919513	0.95718		Roseburia	0.02516	0.138714	0.006122	0.015657	7.1e-05	0.000324
Clostridium	0.101054	0.518739	0.02561	0.041455	0.028936	0.065106		Ruminococcus	0.02475	0.163395	0.006409	0.010926	0.002089	0.006538
Brevundimonas	0.098647	0.155981	0.040622	0.107151	4e-06	2.8e-05		Mogibacterium	0.024544	0.037986	0.114914	0.13322	0	0
Flavobacterium	0.098353	0.431828	0.000612	0.002728	0	0		Brucella	0.023628	0.177709	0.346067	2.45446	0.013935	0.033223
Enhydrobacter	0.093562	0.258908	0.027482	0.037989	0.044309	0.091405		Cronobacter	0.023483	0.177244	0.000112	0.000491	0.14635	0.23046
Kocuria	0.087426	0.159111	0.106603	0.382679	0.234498	0.334334		Dialister	0.023087	0.13552	0.017294	0.039153	0.003182	0.009708
Peptostreptococcus	0.083105	0.19651	0.037599	0.035364	0.000593	0.002512		Lachnoanaerobaculum	0.019864	0.043219	0.324575	0.849881	0	0
Comamonas	0.077997	0.200649	0.009279	0.016138	0.000729	0.002943		Luteibacter	0.01946	0.147316	7.6e-05	0.000411	0.213253	0.29872
Peptococcus	0.077592	0.403518	0.001583	0.006732	0.042147	0.089252		Treponema	0.01908	0.065443	0.011124	0.049264	0.591734	0.622878
Aeromonas	0.074943	0.239611	0.011188	0.016296	0.197763	0.28669		Blautia	0.018043	0.096928	0.006073	0.013512	0.000219	0.000866
Filifactor	0.071491	0.358304	0.000496	0.001355	0.249383	0.35207		Escherichia	0.015099	0.075206	0.000266	0.001524	0.000368	0.001366
Pseudoalteromonas	0.070839	0.464329	0.00204	0.006963	0.009573	0.02601		Rhizobium	0.0149	0.112622	0.000915	0.001529	0.004407	0.012709
Capnocytophaga	0.068744	0.196199	0.011282	0.029011	0.624351	0.682835		Tannerella	0.013799	0.037299	0.018109	0.039246	0.034101	0.074402
Bacillus	0.063971	0.184366	0.107446	0.287951	0.001026	0.003993		Selenomonas	0.013549	0.03426	0.003478	0.004538	0.377373	0.41168
Anaerostipes	0.059821	0.234772	0.011764	0.067993	0.000352	0.001552		Filifactor	0.011346	0.048414	0.000636	0.002098	0.052899	0.105213
Gemmiger	0.057355	0.133144	0.006258	0.029608	0	0		Coprococcus	0.0108	0.054447	0.000987	0.002184	0.189444	0.266406
Luteimonas	0.056606	0.300906	0.000445	0.001813	0.040729	0.088863		Megamonas	0.01001	0.069863	0.000512	0.001673	0.721678	0.750879
Barnesiella	0.055197	0.223437	0.001704	0.010743	2.1e-05	0.000128		Brevundimonas	0.009723	0.072694	0.739287	5.41694	0	0
Coprococcus	0.052439	0.127747	0.005114	0.021641	0	0		Parabacteroides	0.009396	0.066049	0.001957	0.003696	0.004413	0.012709
Chryseobacterium	0.051897	0.20008	0.004864	0.016426	0	0		Lactococcus	0.009211	0.055649	0.017348	0.070709	0	0
Parabacteroides	0.051556	0.104498	0.006209	0.015144	0.000288	0.00131		Sphingomonas	0.008458	0.05778	0.006164	0.018956	0	0
Lactococcus	0.050628	0.109549	0.010721	0.010018	0.373969	0.436634		Bifidobacterium	0.006939	0.044399	0.020967	0.137283	0	0
Wautersiella	0.047102	0.087229	9.8e-05	0.00076	0	0		Anaerostipes	0.006844	0.031416	0.000779	0.002025	0.362917	0.399542
Streptobacillus	0.046248	0.115475	0.000702	0.001425	0.000111	0.000571		Kingella	0.006573	0.017313	0.121503	0.689629	9e-06	4.9e-05
unclassified_Acidobacteria	0.046151	0.138286	0.025173	0.043687	0.001633	0.005978		Butyrivibrio	0.006316	0.018716	0.002271	0.0045	0.944439	0.963167
Oribacterium	0.045729	0.129162	0.100779	0.071728	0	0		Alistipes	0.00529	0.034437	0.001586	0.0024	0.000387	0.001422
Succinivibrio	0.045672	0.145742	0.000644	0.002253	0.008793	0.024042		Clostridium	0.005191	0.026796	0.007615	0.008879	0	0
Collinsella	0.045426	0.166569	0.00699	0.037988	0.000172	0.000864		Delftia	0.004889	0.03755	0.001331	0.003674	4.2e-05	0.000204
Paracoccus	0.04351	0.095239	0.029731	0.096272	0.038799	0.085516		Cardiobacterium	0.00477	0.010128	0.003133	0.004702	0.889088	0.914491
Anoxybacillus	0.042586	0.252695	0.003506	0.005665	0.771723	0.819126		Paraprevotella	0.004642	0.033749	0.000778	0.002879	0.218085	0.30313
Dorea	0.042161	0.107726	0.006424	0.029937	0.001583	0.005845		Aquabacterium	0.004455	0.033743	0.000335	0.001346	0.273609	0.365147
Megasphaera	0.040368	0.111633	0.017797	0.023947	0.019594	0.047823		Lachnoclostridium	0.004408	0.02361	0.00507	0.005047	0	0
Sphingomonas	0.040136	0.094633	0.013533	0.020632	0.061523	0.117601		Parasutterella	0.004392	0.032328	0.001034	0.001739	6.3e-05	0.000291
Mycoplasma	0.040035	0.238776	1.04627	3.82834	0	0		Enhydrobacter	0.004176	0.025684	0.22795	1.52767	0	0
Parasutterella	0.037302	0.06653	0.003796	0.017522	0.000223	0.00107		Collinsella	0.003939	0.025242	0.000458	0.001184	0.432847	0.467943
Eikenella	0.036909	0.139209	0.008156	0.026448	0.418931	0.484398		Dorea	0.00389	0.020155	0.001413	0.003241	0.006261	0.017338
Bifidobacterium	0.035975	0.092432	0.021578	0.059512	0.933634	0.969543		Ruminiclostridium	0.003094	0.023766	0.001102	0.002357	0.000153	0.00064
Aquabacterium	0.030561	0.065139	0.000908	0.002469	0	0		Pelomonas	0.002908	0.02234	7.6e-05	0.000414	0.590416	0.622878
Marinobacter	0.029939	0.228845	0.316406	2.0707	2.1e-05	0.000128		Erysipelatoclostridium	0.002775	0.019968	0.0038	0.004831	0	0
Rheinheimera	0.029502	0.214209	0.000443	0.001243	0.476523	0.541767		Gemmiger	0.002744	0.014758	0.002057	0.005842	0.003909	0.011609
Alistipes	0.029064	0.062167	0.017355	0.085591	0.189276	0.277987		Comamonas	0.002438	0.014059	0.002177	0.003532	0.000983	0.003386
Phascolarctobacterium	0.028867	0.061747	0.002545	0.00806	0.000315	0.001418		Phascolarctobacterium	0.002406	0.012974	0.001161	0.002955	0.00753	0.019226
Psychrobacter	0.026782	0.094451	0.003842	0.005007	0.243102	0.344328		Barnesiella	0.002303	0.014779	0.000308	0.001158	0.916426	0.939924
Solobacterium	0.025654	0.084403	0.195224	0.225582	0	0		Methylobacterium	0.002166	0.016636	0.000954	0.00191	4.2e-05	0.000204
Tannerella	0.025635	0.1158	0.006721	0.017935	0.095787	0.168211		Bilophila	0.002104	0.016161	0.000113	0.000497	0.336178	0.37124
Blastomonas	0.025349	0.099943	0.000543	0.002258	0	0		Chryseobacterium	0.002028	0.014733	0.012055	0.048124	1.7e-05	8.9e-05
Succiniclasticum	0.024528	0.097626	0.000258	0.001706	0.003489	0.010844		unclassified_Acidobacteria	0.001946	0.010265	0.009435	0.015557	0	0
Delftia	0.023492	0.040806	0.005245	0.008005	0.002545	0.008144		Sutterella	0.001918	0.014735	0.000529	0.001836	0.061447	0.11893
Achromobacter	0.022872	0.058113	0.039922	0.063801	1.1e-05	7.1e-05		Wautersiella	0.001914	0.014259	0.000113	0.000496	0.702278	0.732812
Thermus	0.022791	0.094421	0.000989	0.002124	0.32181	0.396678		Butyricimonas	0.00153	0.011407	9.2e-05	0.000515	0.97963	0.993237
Brevibacillus	0.021846	0.149072	0.001994	0.004102	0.955677	0.987685		Psychrobacter	0.001413	0.006941	0.001468	0.001994	0.000239	0.000935
Brachybacterium	0.021594	0.075107	0.00248	0.006098	0.01482	0.037007		Desulfovibrio	0.001361	0.010457	0.001143	0.002948	8e-05	0.00036
Sphingobium	0.021361	0.054198	7.9e-05	0.000615	0	0		Mycoplasma	0.001346	0.004169	0.424829	1.25163	0	0
Mogibacterium	0.019958	0.046525	0.049951	0.057629	0	0		Enterococcus	0.001341	0.004843	0.002322	0.002701	1e-06	6e-06
Erysipelatoclostridium	0.019753	0.064026	0.010692	0.043077	0.614936	0.67459		Vibrio	0.001262	0.004582	0.001515	0.002235	0.022401	0.052028
Deinococcus	0.019336	0.069023	0.000504	0.001639	4e-06	2.8e-05		Bulleidia	0.001233	0.006676	0.000643	0.002194	0.28324	0.365147
Dialister	0.019271	0.050012	0.285048	1.85399	0.796359	0.841142		Cellvibrio	0.001222	0.009032	0	0	0.155537	0.23046
Cloacibacterium	0.018847	0.130676	0.000904	0.003033	0.439395	0.504837		Anaerovorax	0.001215	0.004544	0.000792	0.001961	0.214788	0.299704
Sutterella	0.018778	0.058054	0.012262	0.073068	0.27017	0.37894		Photobacterium	0.001212	0.006538	0.000266	0.001056	0.825658	0.851682
Ruminiclostridium	0.018522	0.046492	0.005228	0.011016	0.842086	0.880826		Thermovirga	0.001176	0.009031	0	0	0.321377	0.365147
Fructobacillus	0.018511	0.139694	4e-05	0.00031	0.303089	0.396678		Ohtaekwangia	0.001146	0.008311	0.000407	0.001923	0.279356	0.365147
Abiotrophia	0.01802	0.056949	0.280207	0.477325	0	0		Epilithonimonas	0.001114	0.008556	7.4e-05	0.000575	0.990478	0.993237
Olsenella	0.01751	0.069514	0.000568	0.001356	0.368862	0.436571		Exiguobacterium	0.001111	0.007617	0.000865	0.002577	0.004709	0.013454
Catonella	0.016641	0.055625	0.00285	0.003575	0.10748	0.186471		Achromobacter	0.001097	0.008082	0.006473	0.007671	0	0
Aggregatibacter	0.016611	0.062027	0.000882	0.002257	0.012353	0.03254		Caulobacter	0.001089	0.005867	0.000559	0.00322	0.702278	0.732812
Micrococcus	0.01611	0.044494	0.396643	1.95697	0	0		Thauera	0.001058	0.003911	0.000152	0.000576	0.416861	0.452018
Turicibacter	0.014118	0.09048	0.013042	0.021149	0	0		Geobacillus	0.001046	0.005695	0.000345	0.001254	0.285195	0.365147
Atopostipes	0.013789	0.051241	0.024532	0.050833	9.1e-05	0.000479		Gordonia	0.00099	0.007605	0.000376	0.000937	0.010893	0.027232
Cellvibrio	0.013778	0.025216	0.000287	0.001078	0	0		Arthrobacter	0.000929	0.004837	0.000205	0.000699	0.641635	0.673436
Halomonas	0.013531	0.099655	0.02521	0.039065	0	0		Slackia	0.000915	0.005707	0.00074	0.001506	0.007622	0.019323
Alteromonas	0.013484	0.09539	0.000799	0.00261	0.251156	0.353418		Pseudoalteromonas	0.000915	0.005798	0.000541	0.001536	0.127356	0.209352
Lachnoclostridium	0.012278	0.025505	0.017767	0.035148	0.00024	0.001139		Aerococcus	0.00088	0.003932	0.005172	0.010703	0	0
Selenomonas	0.012029	0.054842	0.00221	0.003123	0.039645	0.086937		Flavobacterium	0.000877	0.004493	7.6e-05	0.000413	0.365932	0.401633
Pelomonas	0.012002	0.04323	0.000937	0.00497	5e-06	3.4e-05		Hydrogenophilus	0.000866	0.006654	3.7e-05	0.000285	0.990478	0.993237
Brevibacterium	0.011968	0.053007	0.013288	0.024138	1.2e-05	7.6e-05		Kocuria	0.000865	0.00481	0.074898	0.328213	0	0
Hydrogenophilus	0.011968	0.024591	0.000549	0.001506	7e-06	4.7e-05		Olsenella	0.000807	0.004847	0.001019	0.002137	0.006687	0.018237
Butyricimonas	0.011653	0.031795	0.004511	0.032171	0.000213	0.001046		Akkermansia	0.000762	0.004807	0.011212	0.016868	0	0
Ohtaekwangia	0.011367	0.036553	0.000423	0.000986	0.140232	0.239448		Luteimonas	0.000667	0.003699	0.003516	0.018425	0.310382	0.365147
Streptomyces	0.011285	0.04471	0.006096	0.022655	0.027344	0.062501		Carnobacterium	0.000631	0.003403	0.000962	0.002507	0.001348	0.004372
Devosia	0.011171	0.056332	0.000835	0.001734	0.496851	0.561884		Anoxybacillus	0.000619	0.004753	0.002507	0.004691	0	0
Sphingobacterium	0.011035	0.021622	0.000386	0.001346	2e-06	1.5e-05		Devosia	0.000618	0.003081	0.000265	0.000737	0.243877	0.336382
Truepera	0.010618	0.041409	4e-05	0.000308	0.000262	0.001217		Parascardovia	0.000575	0.003639	0	0	0.079825	0.145036
Globicatella	0.010258	0.033913	0	0	6.8e-05	0.000372		Steroidobacter	0.000517	0.00288	0.000677	0.001858	0.035373	0.076713
Akkermansia	0.010098	0.022948	0.016049	0.020687	0.000674	0.002747		Turicibacter	0.000514	0.002873	0.004559	0.006968	0	0
Bosea	0.009637	0.024487	0.000881	0.003104	4.3e-05	0.000244		Coprobacillus	0.00051	0.003914	0	0	0.321377	0.365147
Tyzzerella	0.009487	0.050907	0.000674	0.001437	0.966732	0.98964		Kinneretia	0.000495	0.003803	0.000249	0.00088	0.108497	0.179169
Anaerococcus	0.009097	0.030378	0.001859	0.005262	0.481488	0.545939		Leuconostoc	0.00049	0.002648	0.000999	0.002454	0.004272	0.012503
Soonwooa	0.008502	0.0216	0.000174	0.000856	1e-06	8e-06		Oscillibacter	0.00044	0.002083	0.00089	0.001869	0.007171	0.018661
Paraprevotella	0.008308	0.022498	0.006818	0.04049	0.001945	0.006776		Tyzzerella	0.000433	0.003327	0.000229	0.000813	0.108497	0.179169
Hydrogenophaga	0.008289	0.046668	0.002666	0.007226	0.419363	0.484398		Streptomyces	0.000424	0.001839	0.001421	0.003558	0.002062	0.006538
Oscillibacter	0.007962	0.018336	0.004349	0.011318	0.463145	0.529309		Blastomonas	0.000399	0.001751	0.000267	0.000855	0.368926	0.403688
Serinicoccus	0.007962	0.053349	0.000346	0.000942	0.307228	0.396678		Aeromonas	0.000381	0.001692	0.005832	0.009562	0	0
Exiguobacterium	0.00795	0.033312	0.002743	0.00522	0.807132	0.846313		Tropheryma	0.000359	0.002255	0	0	0.155537	0.23046
Centipeda	0.007701	0.017624	0	0	0	0		Flavonifractor	0.000349	0.002044	0.001038	0.00161	3.2e-05	0.00016
Bilophila	0.007175	0.016355	0.000518	0.00175	0.000243	0.001141		Dietzia	0.000313	0.001958	0.001184	0.003163	0.001088	0.003661
Erythrobacter	0.007103	0.034376	0.000342	0.001068	0.190632	0.277987		Brevibacillus	0.000309	0.002377	0.000643	0.001251	0.000538	0.001937
Ilumatobacter	0.007102	0.035323	0.000148	0.000688	0.149443	0.244753		Rheinheimera	0.000309	0.002377	0.000304	0.000985	0.061447	0.11893
Moryella	0.007067	0.037237	0	0	0.001782	0.006362		Succinivibrio	0.000309	0.001952	0.000194	0.000649	0.285195	0.365147
Rubellimicrobium	0.006997	0.024129	0.000307	0.001386	0.003578	0.011041		Lewinella	0.000309	0.002377	7.8e-05	0.000424	0.590416	0.622878
Paenibacillus	0.006614	0.025424	0.000893	0.001958	0.208818	0.301704		Peptoniphilus	0.000263	0.002021	0.000419	0.001245	0.019488	0.045854
Nitrospira	0.006612	0.031458	0.000882	0.001989	0.585363	0.650069		Scardovia	0.000255	0.001207	0.001055	0.002666	0.006343	0.017431
Arthrobacter	0.006461	0.014004	4e-05	0.000311	0	0		Alteromonas	0.000251	0.001925	0.000655	0.002964	0.05966	0.116726
Enterococcus	0.00613	0.018538	0.002283	0.00249	0.387161	0.450818		Peredibacter	0.000248	0.001901	0	0	0.321377	0.365147
Caulobacter	0.006047	0.015462	0.001363	0.006569	0.003823	0.011631		Paenibacillus	0.000247	0.000994	0.000267	0.000741	0.446307	0.481049
Methylobacterium	0.005929	0.016485	0.002905	0.011455	0.221431	0.317801		Saccharofermentans	0.000213	0.001152	0.000231	0.00082	0.285195	0.365147
Peptoniphilus	0.005916	0.022325	0.032167	0.224201	0.549079	0.617714		Finegoldia	0.00021	0.001617	0.001038	0.002433	0.000148	0.000627
Desulfovibrio	0.005706	0.022506	0.008225	0.036606	0.001135	0.00429		Propionibacterium	0.000186	0.001426	0.002195	0.002805	0	0
Facklamia	0.005623	0.025111	0.001221	0.002489	0.594049	0.656341		Facklamia	0.000186	0.001426	0.00057	0.001165	0.000997	0.003386
Leuconostoc	0.005615	0.025956	0.00188	0.003441	0.010824	0.029043		Soonwooa	0.000186	0.001426	0.0003	0.001246	0.108497	0.179169
Saccharofermentans	0.005506	0.028145	0.001412	0.003823	0.090411	0.160072		Cohnella	0.000186	0.001426	7.6e-05	0.000412	0.590416	0.622878
Lysobacter	0.005457	0.024811	0.00316	0.015898	0.34809	0.413118		Acidaminococcus	0.000186	0.001426	3.7e-05	0.000288	0.990478	0.993237
Dermacoccus	0.005449	0.016703	0.00912	0.036185	0.178796	0.26452		Globicatella	0.000186	0.001426	0	0	0.321377	0.365147
Propionibacterium	0.005375	0.036888	0.007464	0.012691	0	0		Brachymonas	0.000176	0.000782	0.00178	0.003906	0.000155	0.000641
Cardiobacterium	0.00527	0.016284	0.000976	0.001704	0.574808	0.642709		Macrococcus	0.000169	0.000742	3.9e-05	0.000301	0.295167	0.365147
Actinobaculum	0.005099	0.038515	0	0	0.155537	0.244753		Weissella	0.000166	0.000732	0.000539	0.001154	0.020442	0.047786
Arcobacter	0.005055	0.011917	0.000349	0.001855	0.003392	0.010618		Gemmatimonas	0.000154	0.001186	0.000713	0.00159	0.000997	0.003386
Schlegelella	0.004918	0.014578	0.000114	0.000503	0.004184	0.012552		Pantoea	0.000128	0.000692	0	0	0.155537	0.23046
Parascardovia	0.004732	0.036346	0	0	0.321377	0.396678		Oceanobacillus	0.000126	0.000689	0.000209	0.000711	0.279361	0.365147
Weissella	0.004619	0.017353	0.002854	0.010026	0.238687	0.339187		Gardnerella	0.000125	0.000964	0.00447	0.03431	0.576977	0.61819
Aerococcus	0.004571	0.016136	0.007124	0.020833	8.5e-05	0.000459		Sphingobium	0.000124	0.000951	7.5e-05	0.000405	0.590416	0.622878
Pseudoxanthomonas	0.004465	0.014978	0.000271	0.000877	0.00233	0.007568		Deinococcus	0.000124	0.000951	3.9e-05	0.000302	0.990478	0.993237
Rhodocytophaga	0.004299	0.033018	0	0	0.321377	0.396678		Victivallis	0.000124	0.000951	3.8e-05	0.000298	0.990478	0.993237
Kingella	0.004209	0.017079	0.014042	0.029246	0	0		Luteolibacter	0.000124	0.000951	0	0	0.321377	0.365147
Ensifer	0.004135	0.020909	4e-05	0.000311	0.003628	0.011116		Succiniclasticum	0.000122	0.000659	0.000154	0.00058	0.453298	0.487126
Pusillimonas	0.003398	0.017117	0	0	0.003364	0.010608		Methylophilus	0.000118	0.000641	0.000757	0.002103	0.029332	0.065182
Rhodococcus	0.003396	0.013454	0.035124	0.05111	0	0		Microvirga	0.000113	0.000611	0.000421	0.001745	0.251414	0.345454
Nocardioides	0.003382	0.013704	0.001034	0.002516	0.875457	0.91352		Lysobacter	0.000103	0.000791	0.000528	0.001535	0.018312	0.043371
Butyrivibrio	0.003344	0.014209	0.0012	0.003053	0.37309	0.436634		Dokdonella	0.000103	0.000791	0.000343	0.001106	0.033644	0.073853
Chlamydia	0.003278	0.023728	0	0	0.155537	0.244753		Thermoactinomyces	0.000103	0.000791	0.000118	0.000676	0.590416	0.622878
Peptoclostridium	0.003268	0.013182	0.000192	0.000784	0.100179	0.175212		Eggerthella	0.000102	0.000783	0	0	0.321377	0.365147
Sphingopyxis	0.003244	0.01051	0.001039	0.002021	0.577248	0.642709		Microbacterium	9.5e-05	0.00073	0	0	0.321377	0.365147
Kinneretia	0.003204	0.0073	0.000866	0.001714	0.718963	0.766894		Skermanella	9.2e-05	0.000705	0.00023	0.001026	0.185977	0.262556
Luteolibacter	0.003136	0.0204	0	0	0.155537	0.244753		Burkholderia	8.5e-05	0.000653	0.009414	0.053702	0	0
Lachnoanaerobaculum	0.003092	0.012142	0.061839	0.065222	0	0		Marmoricola	7.5e-05	0.000573	0.000525	0.002278	0.057916	0.114559
Flavonifractor	0.003081	0.008294	0.003799	0.006708	0.000545	0.002331		Odoribacter	7.4e-05	0.000568	0.000614	0.001631	0.005493	0.015329
Perlucidibaca	0.003076	0.023631	0.000857	0.003223	0.019488	0.047823		Nocardiopsis	7.4e-05	0.000565	0.000189	0.000632	0.108497	0.179169
Steroidobacter	0.003042	0.008606	0.001197	0.002709	0.220948	0.317801		Moryella	7.4e-05	0.000568	0	0	0.321377	0.365147
Tissierella	0.003016	0.01231	0	0	0.001782	0.006362		Rhodococcus	6.7e-05	0.000511	0.010814	0.014017	0	0
Roseomonas	0.002958	0.010209	0.000476	0.003119	0.056506	0.109958		Elizabethkingia	6.6e-05	0.000504	0.261484	1.48598	0	0
Undibacterium	0.002828	0.01812	0.000111	0.00063	0.373411	0.436634		Marinobacter	6.3e-05	0.000482	0.019347	0.056574	1.6e-05	8.5e-05
Pedobacter	0.002757	0.015035	3.6e-05	0.000277	0.006918	0.019924		Micrococcus	6e-05	0.000458	0.037454	0.07778	0	0
Finegoldia	0.00268	0.007737	0.060605	0.432539	0.056441	0.109958		Cobetia	5.8e-05	0.000448	0	0	0.321377	0.365147
Vogesella	0.002616	0.007922	0.001234	0.00491	0.050659	0.101318		Anaerococcus	5.3e-05	0.000404	0.0005	0.001204	0.005493	0.015329
Empedobacter	0.002515	0.019027	0	0	0.155537	0.244753		Negativicoccus	5.3e-05	0.000404	0	0	0.321377	0.365147
Nubsella	0.002511	0.005136	0	0	2e-06	1.5e-05		Brochothrix	5.2e-05	0.000397	0.000671	0.001384	0.000841	0.002939
Flavisolibacter	0.002509	0.012582	3.6e-05	0.00028	0.159526	0.244753		Parapedobacter	5.2e-05	0.000396	0	0	0.321377	0.365147
Catenibacterium	0.002391	0.014937	0.001409	0.006736	0.803691	0.846313		Jeotgalicoccus	5.1e-05	0.000392	0.002463	0.005073	0	0
Eggerthella	0.002285	0.007472	0	0	0.000939	0.003756		Bosea	5.1e-05	0.000396	0.001649	0.007061	0.001549	0.004979
Actinomadura	0.002236	0.017177	0.000269	0.00157	0.336178	0.401185		Nitrospira	5.1e-05	0.000396	0.000697	0.00252	0.031651	0.069904
Bdellovibrio	0.00223	0.012808	0	0	0.041938	0.089247		Rubellimicrobium	5.1e-05	0.000396	0.000539	0.002339	0.102464	0.172369
Dietzia	0.002218	0.006368	0.001959	0.004665	0.165255	0.247197		Nocardioides	5.1e-05	0.000396	0.000268	0.000861	0.059657	0.116726
Brumimicrobium	0.002203	0.012062	0	0	0.011866	0.031449		Agromyces	5.1e-05	0.000396	0	0	0.321377	0.365147
Geobacillus	0.002185	0.006138	0.000282	0.000898	0.027866	0.063251		Flavihumibacter	5.1e-05	0.000391	0	0	0.321377	0.365147
Gaiella	0.002154	0.008038	0.006444	0.01384	0.000185	0.000919		Geminicoccus	5.1e-05	0.000396	0	0	0.321377	0.365147
Chryseomicrobium	0.002147	0.013478	0.000255	0.001214	0.960871	0.98964		Ureaplasma	4.1e-05	0.000313	0.000298	0.002307	1	1
Terrimonas	0.002117	0.011826	0.000157	0.000851	0.233051	0.333371		Ralstonia	0	0	0.916068	2.22029	0	0
Cobetia	0.002106	0.007817	0.000115	0.000507	0.14635	0.244753		Buchnera	0	0	0.268212	0.689648	0	0
Mycobacterium	0.002057	0.004252	0.006739	0.018164	0.013984	0.035328		Ochrobactrum	0	0	0.252503	1.79267	6e-06	3.3e-05
Odoribacter	0.002048	0.005955	0.004112	0.022062	0.941598	0.975468		Paracoccus	0	0	0.014703	0.043366	0	0
Piscinibacter	0.002031	0.007883	0.00111	0.002677	0.435805	0.502047		Brevibacterium	0	0	0.0092	0.026983	0	0
Vagococcus	0.002021	0.008983	0.000851	0.002392	0.188232	0.27753		Salinicoccus	0	0	0.008149	0.008663	0	0
Herminiimonas	0.001994	0.009602	0.000282	0.001218	0.302394	0.396678		Atopostipes	0	0	0.007877	0.013381	0	0
Myroides	0.001934	0.005719	0.000189	0.000634	0.114992	0.197129		Alcanivorax	0	0	0.007392	0.022215	0.000324	0.001215
Marmoricola	0.001864	0.00662	0.001222	0.003156	0.373491	0.436634		Shewanella	0	0	0.006592	0.007726	0	0
Haliea	0.001826	0.009033	0.000997	0.006843	0.663743	0.716989		Halomonas	0	0	0.00655	0.008618	0	0
Kribbella	0.00181	0.013509	7.4e-05	0.000404	0.966056	0.98964		Trichococcus	0	0	0.006348	0.017717	0	0
Dechloromonas	0.001799	0.008087	0.002189	0.01015	0.476554	0.541767		Allobaculum	0	0	0.005026	0.010512	0	0
Acholeplasma	0.00171	0.006529	0.000188	0.00086	0.059191	0.114154		Serratia	0	0	0.003943	0.005918	0	0
Skermanella	0.001707	0.007792	0.000512	0.00192	0.974264	0.992776		Conexibacter	0	0	0.003474	0.007748	1e-06	6e-06
Kytococcus	0.001704	0.010015	0.000223	0.000891	0.646997	0.702268		Dermacoccus	0	0	0.003128	0.011594	3e-06	1.7e-05
Gordonia	0.00169	0.008447	0.000339	0.000919	0.805293	0.846313		Bradyrhizobium	0	0	0.003057	0.00437	0	0
Serratia	0.001648	0.008742	0.013554	0.027465	0	0		Massilia	0	0	0.002285	0.004782	0	0
Burkholderia	0.00163	0.005048	0.007594	0.021993	0.000384	0.001676		Geobacter	0	0	0.002184	0.005419	2.4e-05	0.000122
Jeotgalicoccus	0.001606	0.008172	0.012292	0.024896	0	0		Gaiella	0	0	0.001842	0.003432	1e-06	6e-06
Petrobacter	0.001586	0.005612	5.4e-05	0.00042	0.002165	0.00714		Herbaspirillum	0	0	0.001408	0.00859	0.013359	0.032062
Alcaligenes	0.001537	0.007859	0.071399	0.524288	0.052618	0.104751		Brachybacterium	0	0	0.00125	0.003152	4.6e-05	0.000218
Dokdonella	0.001517	0.009483	0.00068	0.001956	0.092308	0.162763		Mycobacterium	0	0	0.001164	0.002078	6e-06	3.3e-05
Mitsuokella	0.001517	0.008363	3.9e-05	0.000302	0.295167	0.396678		Actinoallomurus	0	0	0.001073	0.002384	2.4e-05	0.000122
Pelagibacterium	0.001489	0.009683	3.6e-05	0.00028	0.295167	0.396678		Tsukamurella	0	0	0.001049	0.003841	0.000324	0.001215
Helcococcus	0.00145	0.011138	0.007085	0.054593	0.576977	0.642709		Sneathia	0	0	0.001042	0.008074	0.329647	0.365147
Pyramidobacter	0.001418	0.004405	0	0	0.006325	0.018338		Catenibacterium	0	0	0.00093	0.004879	0.024601	0.055008
Ktedonobacter	0.001407	0.010808	0	0	0.321377	0.396678		Enterorhabdus	0	0	0.000818	0.002041	0.000171	0.000692
Anaerotruncus	0.001395	0.005314	3.9e-05	0.000301	0.024656	0.056959		Tumebacillus	0	0	0.000797	0.002819	0.007257	0.018661
Mobilicoccus	0.001394	0.007578	0	0	0.079825	0.147369		Dechloromonas	0	0	0.000776	0.003193	0.007257	0.018661
Alkaliphilus	0.001388	0.005838	0.00024	0.000843	0.66452	0.716989		Acetobacter	0	0	0.000769	0.002083	0.002125	0.006538
Methyloversatilis	0.001372	0.006886	0.002063	0.007194	0.16537	0.247197		Methylophaga	0	0	0.000735	0.002557	0.007257	0.018661
Thermovirga	0.001319	0.005815	0	0	0.022264	0.053138		Mucispirillum	0	0	0.000726	0.001433	4.6e-05	0.000218
Cellulomonas	0.001304	0.003624	0.000228	0.001074	0.053923	0.106369		Cupriavidus	0	0	0.000724	0.001545	0.000171	0.000692
Curvibacter	0.001282	0.0062	0.000725	0.002329	0.334965	0.401185		Microbulbifer	0	0	0.000713	0.002867	0.002125	0.006538
Anaeroplasma	0.001273	0.005807	0	0	0.022264	0.053138		Rubrobacter	0	0	0.000702	0.001457	8.9e-05	0.000386
Trichococcus	0.001254	0.006432	0.003089	0.003286	0	0		Butyricicoccus	0	0	0.000687	0.003439	0.013359	0.032062
Salinicoccus	0.001251	0.005191	0.026709	0.031829	0	0		Solirubrobacter	0	0	0.000682	0.001345	8.9e-05	0.000386
Parvularcula	0.001232	0.00711	0	0	0.079825	0.147369		Dermabacter	0	0	0.000674	0.004623	0.085007	0.145036
Anaerovorax	0.001206	0.007031	0.000704	0.002147	0.037064	0.082111		Yaniella	0	0	0.00064	0.001247	8.9e-05	0.000386
Cupriavidus	0.001145	0.006647	0.00506	0.008822	1e-06	8e-06		Methyloversatilis	0	0	0.000639	0.001889	0.002125	0.006538
Gemmatimonas	0.00113	0.003253	0.001599	0.003502	0.063421	0.120695		Pseudonocardia	0	0	0.00059	0.001482	0.001142	0.003737
Oceanobacillus	0.001128	0.004962	0.000289	0.000806	0.665538	0.716989		Alcaligenes	0	0	0.000584	0.001373	0.00061	0.002174
Dyadobacter	0.001124	0.006391	0	0	0.022264	0.053138		Zoogloea	0	0	0.000524	0.001325	0.001142	0.003737
Blastocatella	0.001123	0.008624	0	0	0.321377	0.396678		Helicobacter	0	0	0.000496	0.001037	0.000324	0.001215
Geminicoccus	0.001109	0.003498	3.7e-05	0.000286	0.024656	0.056959		Shuttleworthia	0	0	0.000495	0.001415	0.001142	0.003737
Psychrosphaera	0.001097	0.008428	0	0	0.321377	0.396678		Hydrogenophaga	0	0	0.000425	0.001178	0.003934	0.011609
Arsenicicoccus	0.00107	0.005781	0	0	0.079825	0.147369		Thermus	0	0	0.000424	0.001316	0.007257	0.018661
Macrococcus	0.001058	0.003433	0.000145	0.000674	0.053923	0.106369		Pelagibius	0	0	0.000407	0.002199	0.045491	0.090982
Howardella	0.001043	0.006819	7.7e-05	0.000419	0.966056	0.98964		Nitrosomonas	0	0	0.000384	0.00173	0.045491	0.090982
Petrimonas	0.001041	0.006173	0	0	0.041938	0.089247		Fastidiosipila	0	0	0.000382	0.001392	0.007257	0.018661
Helicobacter	0.001	0.005589	0.006577	0.021057	0	0		Cycloclasticus	0	0	0.000344	0.001185	0.024601	0.055008
Ralstonia	0.000981	0.003398	5.0162	13.4414	0	0		Anaeroglobus	0	0	0.000341	0.001499	0.045491	0.090982
Microvirga	0.000979	0.002984	0.000508	0.002456	0.14229	0.242005		Curvibacter	0	0	0.000341	0.001011	0.007257	0.018661
Nocardiopsis	0.000957	0.003724	0.000186	0.000739	0.63869	0.694998		Piscinibacter	0	0	0.00034	0.000908	0.003934	0.011609
Rhizomicrobium	0.000929	0.0068	0.000456	0.001582	0.160939	0.244753		Rhodopseudomonas	0	0	0.000332	0.001295	0.045491	0.090982
Microvirgula	0.000927	0.007122	0	0	0.321377	0.396678		Rickettsia	0	0	0.000329	0.00189	0.085007	0.145036
Nesterenkonia	0.000913	0.005623	0	0	0.079825	0.147369		Leifsonia	0	0	0.000321	0.000838	0.003934	0.011609
Blastococcus	0.00091	0.002783	0.000196	0.000655	0.169869	0.253046		Myroides	0	0	0.000307	0.001091	0.013359	0.032062
Sediminibacterium	0.000843	0.006474	0	0	0.321377	0.396678		Oceanisphaera	0	0	0.000301	0.001058	0.024601	0.055008
Craurococcus	0.000841	0.00555	0	0	0.041938	0.089247		Perlucidibaca	0	0	0.000301	0.001129	0.024601	0.055008
Chitinophaga	0.000826	0.006343	0	0	0.321377	0.396678		Cystobacter	0	0	0.000281	0.000793	0.007257	0.018661
Salinimicrobium	0.000812	0.005876	0	0	0.155537	0.244753		Sphingopyxis	0	0	0.000268	0.000858	0.013359	0.032062
Methylophilus	0.000808	0.003442	0.002182	0.006553	0.057796	0.111964		Desemzia	0	0	0.000263	0.001099	0.045491	0.090982
Gardnerella	0.000784	0.005065	0.006183	0.033698	0.763088	0.811956		Eggerthia	0	0	0.00026	0.001091	0.045491	0.090982
Pantoea	0.000769	0.002519	7.5e-05	0.000408	0.022019	0.053138		Ilumatobacter	0	0	0.000251	0.001315	0.085007	0.145036
Shewanella	0.000762	0.004088	0.017987	0.028593	0	0		Vagococcus	0	0	0.000244	0.00075	0.013359	0.032062
Propionigenium	0.00074	0.004243	3.6e-05	0.000279	0.295167	0.396678		Marinobacterium	0	0	0.00023	0.000918	0.045491	0.090982
Tsukamurella	0.000739	0.003803	0.001087	0.002355	0.001905	0.006691		Marinomonas	0	0	0.00023	0.00082	0.024601	0.055008
Cytophaga	0.000717	0.003773	0	0	0.041938	0.089247		Brevinema	0	0	0.000228	0.001083	0.085007	0.145036
Ignavibacterium	0.000708	0.00414	0.00035	0.001538	0.453298	0.519429		Saccharopolyspora	0	0	0.000228	0.00069	0.013357	0.032062
Litorilinea	0.000701	0.00396	0	0	0.155537	0.244753		Alteribacillus	0	0	0.000211	0.000839	0.045491	0.090982
Caedibacter	0.000686	0.002877	4e-05	0.000306	0.159526	0.244753		Alkalibacterium	0	0	0.000196	0.000792	0.045491	0.090982
Gluconobacter	0.000681	0.004938	0	0	0.155537	0.244753		Ensifer	0	0	0.000191	0.000965	0.085007	0.145036
Proteiniclasticum	0.00067	0.003296	0.000306	0.00189	0.630068	0.687347		Sediminibacillus	0	0	0.00019	0.000756	0.045491	0.090982
Rudanella	0.000653	0.005013	0	0	0.321377	0.396678		Chlamydophila	0	0	0.000188	0.000744	0.045491	0.090982
Hyphomicrobium	0.000651	0.002745	0.000119	0.000678	0.373411	0.436634		Thiobacillus	0	0	0.000185	0.000618	0.024601	0.055008
Zoogloea	0.00065	0.002337	0.002027	0.006403	0.0126	0.032989		Dyadobacter	0	0	0.000184	0.000933	0.085007	0.145036
Stenotrophomonas	0.000638	0.003874	0	0	0.155537	0.244753		Prosthecobacter	0	0	0.000183	0.001417	0.329647	0.365147
Solirubrobacter	0.000618	0.003296	0.002393	0.005394	0.00027	0.001241		Pseudoxanthomonas	0	0	0.000168	0.000762	0.085007	0.145036
Candidatus_Hydrogenedens	0.000611	0.00469	0	0	0.321377	0.396678		Bizionia	0	0	0.000157	0.00074	0.085007	0.145036
Actinomycetospora	0.00059	0.004152	0.000809	0.001851	0.006314	0.018338		Phenylobacterium	0	0	0.000154	0.000926	0.162602	0.23046
Hymenobacter	0.000584	0.003005	0	0	0.079825	0.147369		Idiomarina	0	0	0.000153	0.00072	0.085007	0.145036
Alcanivorax	0.000567	0.004354	0.044711	0.21215	0.000218	0.001058		Cryptobacterium	0	0	0.000152	0.000715	0.085007	0.145036
Carnobacterium	0.000559	0.002418	0.000237	0.000722	0.615251	0.67459		Duganella	0	0	0.000152	0.000574	0.045491	0.090982
Jahnella	0.000559	0.004293	4.9e-05	0.00038	0.990478	0.992776		Petrobacter	0	0	0.000151	0.000569	0.045491	0.090982
Sphaerobacter	0.000548	0.004208	3.7e-05	0.000286	0.990478	0.992776		Phocaeicola	0	0	0.000149	0.001153	0.329647	0.365147
Elizabethkingia	0.000542	0.002067	0.014718	0.04349	1.6e-05	0.0001		Sarcina	0	0	0.000148	0.000558	0.045491	0.090982
Anaerovibrio	0.000539	0.002205	0.000107	0.000473	0.401636	0.466416		Allisonella	0	0	0.000135	0.000603	0.085007	0.145036
Marinomonas	0.000515	0.002858	0.000157	0.000591	0.779314	0.825156		Actinomycetospora	0	0	0.000117	0.000513	0.085007	0.145036
Negativicoccus	0.000501	0.002628	0	0	0.079825	0.147369		Anaerovibrio	0	0	0.000117	0.000668	0.162602	0.23046
Ferruginibacter	0.000499	0.002727	0	0	0.155537	0.244753		Aquicella	0	0	0.000117	0.000674	0.162602	0.23046
Victivallis	0.000476	0.002166	0.001884	0.01299	0.975581	0.992776		Desulfobacterium	0	0	0.000117	0.000514	0.085007	0.145036
Allobaculum	0.000472	0.002549	0.05885	0.317723	0	0		Rhizomicrobium	0	0	0.000117	0.000513	0.085007	0.145036
Mesonia	0.00047	0.003612	0.000403	0.002546	0.336178	0.401185		Candidatus_Endomicrobium	0	0	0.000116	0.000902	0.329647	0.365147
Vampirovibrio	0.000464	0.003562	0	0	0.321377	0.396678		Gallaecimonas	0	0	0.000116	0.000669	0.162602	0.23046
Nevskia	0.000454	0.002115	3.6e-05	0.000277	0.295167	0.396678		Haliea	0	0	0.000116	0.000512	0.085007	0.145036
Oceanicola	0.00044	0.002793	7.3e-05	0.000397	0.608503	0.670595		Helcococcus	0	0	0.000115	0.000507	0.085007	0.145036
Microbacterium	0.000411	0.001863	0	0	0.041938	0.089247		Sphingobacterium	0	0	0.000114	0.000501	0.085007	0.145036
Brochothrix	0.000403	0.002464	0.000897	0.002537	0.019462	0.047823		Sporobacter	0	0	0.000114	0.000664	0.162602	0.23046
Phenylobacterium	0.000399	0.001947	0.000752	0.002283	0.103292	0.179928		Syntrophomonas	0	0	0.000114	0.000501	0.085007	0.145036
Defluviicoccus	0.000396	0.00237	0	0	0.155537	0.244753		Alkanindiges	0	0	0.000113	0.000496	0.085007	0.145036
Panacagrimonas	0.000383	0.002943	0	0	0.321377	0.396678		Robinsoniella	0	0	0.000113	0.000498	0.085007	0.145036
Saccharopolyspora	0.000352	0.00172	0.001038	0.002312	0.002315	0.007568		Proteiniclasticum	0	0	0.000112	0.000492	0.085007	0.145036
Parapedobacter	0.000345	0.002276	0	0	0.155537	0.244753		unclassified_Armatimonadetes	0	0	0.000112	0.000492	0.085007	0.145036
Parasegetibacter	0.000337	0.00259	0	0	0.321377	0.396678		Desulfobulbus	0	0	0.000111	0.000629	0.162602	0.23046
Moheibacter	0.000328	0.001858	0	0	0.155537	0.244753		Ferribacterium	0	0	0.000109	0.000626	0.162602	0.23046
Flectobacillus	0.000316	0.00174	0	0	0.155537	0.244753		Kofleria	0	0	9.6e-05	0.00053	0.162602	0.23046
Alkanindiges	0.000314	0.002415	0.000166	0.000629	0.191116	0.277987		Polynucleobacter	0	0	9.3e-05	0.000516	0.162602	0.23046
Aequorivita	0.000313	0.002408	0.004343	0.02755	0.031651	0.070846		Caedibacter	0	0	9.2e-05	0.000515	0.162602	0.23046
Pseudonocardia	0.00031	0.001217	0.000983	0.002703	0.065264	0.123658		Alkaliphilus	0	0	8e-05	0.000433	0.162602	0.23046
Enterorhabdus	0.000308	0.001727	0.002188	0.006807	0.000155	0.000788		Actinomadura	0	0	7.9e-05	0.00061	0.329647	0.365147
Niastella	0.000307	0.002355	0	0	0.321377	0.396678		Herminiimonas	0	0	7.9e-05	0.000427	0.162602	0.23046
Arenimonas	0.000294	0.001444	0.000352	0.001179	0.34473	0.410257		Sphaerobacter	0	0	7.9e-05	0.000432	0.162602	0.23046
Sediminibacillus	0.000287	0.002207	0.000976	0.003846	0.018892	0.046904		Arenimonas	0	0	7.8e-05	0.000424	0.162602	0.23046
Cystobacter	0.000281	0.002159	0.001072	0.002932	0.000964	0.003786		Blastopirellula	0	0	7.8e-05	0.000601	0.329647	0.365147
Marihabitans	0.000274	0.002107	0	0	0.321377	0.396678		Ignavibacterium	0	0	7.8e-05	0.000426	0.162602	0.23046
Flavihumibacter	0.000261	0.002004	0	0	0.321377	0.396678		Opitutus	0	0	7.8e-05	0.000601	0.329647	0.365147
Cetobacterium	0.000259	0.001427	0.001558	0.004008	0.001897	0.006691		Alicyclobacillus	0	0	7.7e-05	0.00042	0.162587	0.23046
Phycisphaera	0.000253	0.001942	0	0	0.321377	0.396678		Nakamurella	0	0	7.7e-05	0.000416	0.162602	0.23046
Dermabacter	0.000248	0.001166	0.001949	0.011914	0.681406	0.73044		Sulfurovum	0	0	7.7e-05	0.000418	0.162602	0.23046
Salegentibacter	0.000235	0.001806	0	0	0.321377	0.396678		Symbiobacterium	0	0	7.7e-05	0.000418	0.162602	0.23046
Holdemania	0.000231	0.001023	5.8e-05	0.000447	0.295167	0.396678		Trueperella	0	0	7.7e-05	0.00042	0.162602	0.23046
Aquisphaera	0.000206	0.001586	7.9e-05	0.000615	0.990478	0.992776		Kytococcus	0	0	7.6e-05	0.00041	0.162602	0.23046
Ruania	0.000206	0.001583	7.3e-05	0.000394	0.590416	0.653999		Vogesella	0	0	7.6e-05	0.000412	0.162602	0.23046
Ochrobactrum	0.000204	0.000798	0.011227	0.029876	0.001669	0.006059		Gallicola	0	0	7.5e-05	0.000407	0.162602	0.23046
Actinospica	0.000192	0.001472	4e-05	0.000312	0.990478	0.992776		Providencia	0	0	7.5e-05	0.000407	0.162602	0.23046
Legionella	0.000172	0.001318	0.000378	0.001431	0.108497	0.186736		Undibacterium	0	0	7.5e-05	0.000409	0.162602	0.23046
Opitutus	0.000155	0.001189	3.7e-05	0.000286	0.990478	0.992776		Candidatus_Koribacter	0	0	7.4e-05	0.000404	0.162602	0.23046
Peredibacter	0.000155	0.00088	3.7e-05	0.00029	0.544026	0.613627		Cellulomonas	0	0	7.4e-05	0.000401	0.162602	0.23046
Longilinea	0.000155	0.001189	0	0	0.321377	0.396678		Holdemania	0	0	7.4e-05	0.000404	0.162602	0.23046
Coprobacillus	0.000154	0.00118	4.4e-05	0.000342	0.990478	0.992776		Thalassomonas	0	0	7.4e-05	0.000405	0.162602	0.23046
Tumebacillus	0.000141	0.001084	0.00052	0.002629	0.319353	0.396678		Pirellula	0	0	7.3e-05	0.000567	0.329647	0.365147
Acidaminococcus	0.000133	0.000581	0.000402	0.002591	0.674141	0.72445		Pseudokineococcus	0	0	7.3e-05	0.000567	0.329647	0.365147
Agromyces	0.000125	0.000963	3.9e-05	0.000304	0.990478	0.992776		Tetragenococcus	0	0	7.2e-05	0.000393	0.162602	0.23046
Erysipelothrix	0.000123	0.000695	0	0	0.155537	0.244753		Propionigenium	0	0	5.7e-05	0.000438	0.329647	0.365147
Bizionia	0.00012	0.000524	0.004592	0.022953	0.294086	0.396678		Rhodocytophaga	0	0	5.7e-05	0.000438	0.329647	0.365147
Bradyrhizobium	0.000115	0.000622	0.033363	0.092055	0	0		Mesonia	0	0	4e-05	0.000313	0.329647	0.365147
Meiothermus	0.000115	0.000883	0.000173	0.001342	1	1		Sphingosinicella	0	0	4e-05	0.000306	0.329647	0.365147
Dongia	9.1e-05	0.000697	0	0	0.321377	0.396678		Acholeplasma	0	0	3.9e-05	0.0003	0.329647	0.365147
Alicyclobacillus	9e-05	0.00069	0.000255	0.000905	0.108497	0.186736		Amycolatopsis	0	0	3.9e-05	0.000301	0.329647	0.365147
Rhodanobacter	8.7e-05	0.000669	0	0	0.321377	0.396678		Saprospira	0	0	3.9e-05	0.000305	0.329647	0.365147
Allisonella	8.4e-05	0.000647	0.000233	0.001267	0.563685	0.632498		Thiomonas	0	0	3.9e-05	0.000304	0.329647	0.365147
unclassified_Armatimonadetes	8.4e-05	0.000642	0.000194	0.00079	0.191116	0.277987		Chryseomicrobium	0	0	3.8e-05	0.000297	0.329647	0.365147
Providencia	8.1e-05	0.000438	0.001434	0.009138	0.160939	0.244753		Edaphobacter	0	0	3.8e-05	0.000296	0.329647	0.365147
Slackia	8.1e-05	0.000622	0.000751	0.001576	0.000964	0.003786		Friedmanniella	0	0	3.8e-05	0.000291	0.329647	0.365147
Butyricicoccus	8e-05	0.000615	0.001558	0.003388	3.3e-05	0.000193		Granulicella	0	0	3.8e-05	0.000294	0.329647	0.365147
Tropheryma	7.7e-05	0.00059	0	0	0.321377	0.396678		Halanaerobium	0	0	3.8e-05	0.000296	0.329647	0.365147
Duganella	5.2e-05	0.000396	0.00032	0.000944	0.032634	0.07267		Kangiella	0	0	3.8e-05	0.000296	0.329647	0.365147
Thermoactinomyces	4.8e-05	0.000368	0.000174	0.000857	0.327696	0.396678		Peptoclostridium	0	0	3.8e-05	0.000297	0.329647	0.365147
Scardovia	4.7e-05	0.000363	0.000259	0.000821	0.05966	0.114547		Schlegelella	0	0	3.8e-05	0.000296	0.329647	0.365147
Sneathia	4.4e-05	0.000337	0.003395	0.019419	0.319353	0.396678		Actinospica	0	0	3.7e-05	0.000288	0.329647	0.365147
Nitrosomonas	4.2e-05	0.000321	0.000503	0.001869	0.056215	0.109958		Anaeroplasma	0	0	3.7e-05	0.000287	0.329647	0.365147
Rubrobacter	4.1e-05	0.000316	0.00234	0.004142	0	0		Cetobacterium	0	0	3.7e-05	0.000288	0.329647	0.365147
Thiobacillus	3.8e-05	0.000295	0.001216	0.003118	0.002478	0.007989		Cloacibacterium	0	0	3.7e-05	0.000283	0.329647	0.365147
Edaphobacter	3.8e-05	0.000294	0.000594	0.001894	0.027965	0.063251		Eremococcus	0	0	3.7e-05	0.000288	0.329647	0.365147
Buchnera	0	0	2.60451	11.4035	0	0		Hyphomicrobium	0	0	3.7e-05	0.000283	0.329647	0.365147
Fastidiosipila	0	0	0.028734	0.210508	0.001142	0.00429		Nesterenkonia	0	0	3.7e-05	0.000288	0.329647	0.365147
Conexibacter	0	0	0.014065	0.042598	0	0		Nevskia	0	0	3.7e-05	0.000288	0.329647	0.365147
Geobacter	0	0	0.008182	0.024323	0	0		Oceanicola	0	0	3.7e-05	0.00029	0.329647	0.365147
Actinoallomurus	0	0	0.004768	0.01319	1e-06	8e-06		Actinobaculum	0	0	3.6e-05	0.000281	0.329647	0.365147
Chlamydophila	0	0	0.004189	0.019442	0.00061	0.002534		Aequorivita	0	0	3.6e-05	0.000277	0.329647	0.365147
Methylophaga	0	0	0.004051	0.016927	0.002125	0.007062		Arcobacter	0	0	3.6e-05	0.000281	0.329647	0.365147
Oceanisphaera	0	0	0.003268	0.013477	0.001142	0.00429		Bacteriovorax	0	0	3.6e-05	0.000281	0.329647	0.365147
Cycloclasticus	0	0	0.003033	0.012218	0.002125	0.007062		Desulfuromonas	0	0	3.6e-05	0.000281	0.329647	0.365147
Yaniella	0	0	0.002738	0.008753	6e-06	4.1e-05		Marihabitans	0	0	3.6e-05	0.000281	0.329647	0.365147
Mucispirillum	0	0	0.00197	0.003825	0	0
Brevinema	0	0	0.001776	0.006592	0.002125	0.007062
Leifsonia	0	0	0.001757	0.00493	8.9e-05	0.000475
Herbaspirillum	0	0	0.0016	0.003359	4.6e-05	0.000255
Eremococcus	0	0	0.001421	0.0087	0.007257	0.020096
Acetobacter	0	0	0.001407	0.003401	4.6e-05	0.000255
Lewinella	0	0	0.001266	0.009499	0.162602	0.244753
Idiomarina	0	0	0.001122	0.004702	0.007257	0.020096
Desulfobacterium	0	0	0.001085	0.003928	0.002125	0.007062
Marinobacterium	0	0	0.000996	0.003414	0.003934	0.011885
Brachymonas	0	0	0.000968	0.002802	0.002125	0.007062
Alkalibacterium	0	0	0.000821	0.002104	0.000324	0.001443
Kangiella	0	0	0.000784	0.003376	0.007257	0.020096
Sphingosinicella	0	0	0.00075	0.004949	0.045491	0.091405
Desulfomonile	0	0	0.000628	0.004565	0.162602	0.244753
Desemzia	0	0	0.000538	0.001519	0.001142	0.00429
Microbulbifer	0	0	0.000535	0.001277	0.00061	0.002534
Candidatus_Koribacter	0	0	0.000493	0.001526	0.007257	0.020096
Tetragenococcus	0	0	0.000475	0.002278	0.024601	0.056959
Desulfobulbus	0	0	0.000471	0.002236	0.085007	0.151124
Syntrophomonas	0	0	0.000449	0.002099	0.013359	0.033948
Gallicola	0	0	0.000448	0.001734	0.013359	0.033948
Nosocomiicoccus	0	0	0.000437	0.001452	0.013359	0.033948
Sarcina	0	0	0.000426	0.001411	0.007257	0.020096
Sulfurovum	0	0	0.000421	0.001763	0.024601	0.056959
Polynucleobacter	0	0	0.000402	0.001856	0.045491	0.091405
Pelagibius	0	0	0.000388	0.002183	0.045491	0.091405
Granulicella	0	0	0.000385	0.001783	0.045491	0.091405
Gallaecimonas	0	0	0.000382	0.001283	0.013359	0.033948
Thalassomonas	0	0	0.000382	0.001518	0.045491	0.091405
Saprospira	0	0	0.000372	0.002308	0.085007	0.151124
Halanaerobium	0	0	0.00034	0.001666	0.085007	0.151124
Nakamurella	0	0	0.000314	0.001328	0.045491	0.091405
Ferribacterium	0	0	0.000307	0.001566	0.045491	0.091405
Gillisia	0	0	0.000307	0.001371	0.045491	0.091405
Robinsoniella	0	0	0.000304	0.00097	0.013359	0.033948
Trueperella	0	0	0.000298	0.001256	0.024601	0.056959
Bulleidia	0	0	0.000293	0.000851	0.007257	0.020096
Thiomonas	0	0	0.00027	0.00181	0.162602	0.244753
Mucilaginibacter	0	0	0.000263	0.002037	0.329647	0.396678
Zobellella	0	0	0.00026	0.001345	0.085007	0.151124
Symbiobacterium	0	0	0.000256	0.00198	0.329647	0.396678
Alteribacillus	0	0	0.000234	0.001118	0.085007	0.151124
Eggerthia	0	0	0.000226	0.000909	0.045491	0.091405
Lawsonia	0	0	0.000199	0.001542	0.329647	0.396678
Bacteriovorax	0	0	0.000193	0.001499	0.329647	0.396678
Halioglobus	0	0	0.000191	0.000974	0.085007	0.151124
Methylosarcina	0	0	0.00019	0.00087	0.085007	0.151124
Shuttleworthia	0	0	0.000189	0.000633	0.024601	0.056959
Cohnella	0	0	0.000186	0.001164	0.162602	0.244753
Ureaplasma	0	0	0.00016	0.000973	0.162602	0.244753
Desulfuromonas	0	0	0.000156	0.000736	0.085007	0.151124
Geothrix	0	0	0.000153	0.000945	0.162602	0.244753
Rickettsia	0	0	0.000153	0.000832	0.162602	0.244753
Rhodopseudomonas	0	0	0.000123	0.000683	0.162602	0.244753
Kofleria	0	0	0.000119	0.000918	0.329647	0.396678
Nisaea	0	0	0.000114	0.00088	0.329647	0.396678
Tessaracoccus	0	0	0.000114	0.000662	0.162602	0.244753
Sporobacter	0	0	0.000112	0.000645	0.162602	0.244753
Parvibaculum	0	0	0.00011	0.000634	0.162602	0.244753
Friedmanniella	0	0	0.000108	0.000614	0.162602	0.244753
Arsenophonus	0	0	8e-05	0.00062	0.329647	0.396678
Paludibacter	0	0	8e-05	0.00062	0.329647	0.396678
Prosthecobacter	0	0	8e-05	0.000434	0.162602	0.244753
Aquicella	0	0	7.9e-05	0.000612	0.329647	0.396678
Armatimonas	0	0	7.6e-05	0.000587	0.329647	0.396678
Cryptobacterium	0	0	7.6e-05	0.000587	0.329647	0.396678
Colwellia	0	0	7.3e-05	0.000567	0.329647	0.396678
Amycolatopsis	0	0	7.2e-05	0.000557	0.329647	0.396678
Sandaracinobacter	0	0	7.2e-05	0.000556	0.329647	0.396678
Pirellula	0	0	4e-05	0.000306	0.329647	0.396678
Anaeroglobus	0	0	3.7e-05	0.000284	0.329647	0.396678

## Sheet: Supplementary Table S5
ID	Method	A. baumannii	A. ursingii	A. variabilis	H. influenzae	H. parainfluenzae	M. catarrhalis	S. aureus	S. warneri	S. danieliae	S. peroris	S. (pseudo)pneumoniae	S. rubneri	S. vestibularis	M. pneumoniae	C. pneumoniae
P1	NP	0.431159	0.370941	2.2136	0.385394	0.012044	0.325176	0.01927	59.0953	0.021678	4.08758	0.284229	0.419116	0.260141	0.004817	0
	OP	0.180024	0.209648	0.004558	0.462594	0.373721	0.250667	0	8.19452	0.031903	52.1067	0.257504	0.738327	2.73682	0.002279	0
	Pathogen Detection	S. aureus
P2	NP	0.076594	0.043084	0.004787	0	0.002394	0	0.04069	82.7258	0.009574	0.390148	0.002394	0.461955	0.696522	0	0
P2	OP	0.151328	0.165297	0.039578	0.940563	0.644891	0.006984	0.002328	2.10462	0.181594	79.1656	0.295671	5.41289	0.381813	0.004656	0
P2	Pathogen Detection	Unknown
P3	NP	0.55514	8.57329	0.009655	4.25044	0.219642	0.014482	0.014482	54.9323	0.168956	1.48198	0.089306	1.11752	0.27757	0.012068	0
P3	OP	0.120378	0.543852	0.008598	3.48667	0.135426	0.00215	0.004299	8.74677	0.118229	4.76569	0.083836	0.870593	0.586844	0.00215	0
P3	Pathogen Detection	H. parainfluenzae
P4	NP	0.414938	0.335902	0.103186	0.590573	0.035127	0.849634	0.017564	67.547	0.021954	1.12626	3.93422	0.300775	0.296384	0.017564	0
P4	OP	0.109855	0.109855	0	0.212844	0.045773	0.112144	0.029752	64.9357	0.032041	1.68444	0.130454	0.665995	0.478327	0.004577	0
P4	Pathogen Detection	S. pneumoniae
P5	NP	0.221566	0.74086	0.006924	0.233106	0.390048	0.006924	0.016156	68.78	0.283881	3.80124	5.27834	3.2681	1.19784	0.02308	0
P5	OP	0.104618	0.501297	0.006539	0.152569	0.054489	0.004359	0.034873	85.1158	0.117696	2.37789	0.067566	3.66165	1.01567	0.00218	0
P5	Pathogen Detection	S. pneumoniae+EBV
P6	NP	0.034662	0.491768	0.119151	0.038995	0.021664	0.004333	0.006499	16.1915	0.036828	2.42418	38.6677	1.25867	0.953206	0.249133	0
P6	OP	0.051181	0.635105	0.039549	0.069792	0.234966	0	0.004653	3.685	0.132604	54.1235	3.34302	5.35768	5.08549	0.70955	0
P6	Pathogen Detection	S. pneumoniae
P7	NP	0.266059	0.304067	0.00543	0.494109	0.01086	0.629853	0.043438	78.509	0.103166	1.43346	0.114025	0.434381	0.399088	0.002715	0
P7	OP	0.326506	0.39616	0.010884	0.491935	0.052241	0.346096	0.01959	65.4296	0.052241	2.95597	1.54764	3.17364	0.91204	0.143663	0
P7	Pathogen Detection	M. pneumoniae+CMV
P8	NP	0.002191	0	0.002191	0.067935	0.087658	0.002191	0.019723	62.4145	0.184081	3.23457	12.5285	3.94898	1.10887	0.01534	0
P8	OP	0.017875	0.008938	0.862474	0.024578	0.020109	0	0.002234	4.92906	0.006703	59.4436	0.580941	0.735113	0.080438	0.004469	0
P8	Pathogen Detection	S. pneumoniae+H1N1
P9	NP	0.123728	0.283721	56.3453	0.044798	0.019199	0.029865	0.004266	13.4757	0.021332	2.14604	0.046931	0.644239	0.136528	0.004266	0.002133
P9	OP	0.05467	0.207289	0.09795	0.052392	0.207289	0.020501	0.004556	1.76765	0.002278	4.3303	0.022779	1.50797	0.537586	0.002278	0
P9	Pathogen Detection	H. influenzae+C. pneumoniae
P10	NP	0.341691	48.9472	0.048483	0.473288	0.01847	0.277047	0.009235	12.8065	0.034631	1.8516	0.177772	1.40601	0.332456	0.002309	0
P10	OP	2.75628	2.09697	0.022893	1.92986	0.428094	0.528822	0.013736	36.4132	0.038918	7.92088	0.18543	0.489904	1.59562	0.004579	0
P10	Pathogen Detection	H. parainfluenzae+RSV
P11	NP	0.416189	64.7657	0.13723	1.6985	0.085487	0	0.004499	13.5408	0.058491	2.87732	1.33405	1.685	1.23507	0.27671	0
P11	OP	0.036899	0.484025	0.04341	2.28338	0.047751	0.019535	0.013023	37.2395	0.039069	39.8225	1.21549	1.46293	1.02882	0.286508	0
P11	Pathogen Detection	S. pneumoniae+CMV
P12	NP	0.756433	0.706947	0.065982	3.43812	0.049486	0.949665	0	2.41304	0.025921	2.6157	1.35498	0.325196	0.259214	0.12725	0
P12	OP	0.213542	0.194347	0.014396	0.501464	0.268727	0.206344	0.002399	17.2537	0.052786	61.4305	0.3671	4.80829	4.70992	0.07438	0
P12	Pathogen Detection	M. pneumoniae+RSV
P13	NP	0.42274	0.466775	0.008807	70.4236	0.184949	0.363292	0.002202	4.19437	0.06165	4.36611	0.347881	1.70857	0.819059	0.066053	0
P13	OP	0.488536	37.3891	0.025349	33.0983	0.13596	0.458578	0.002304	3.75389	0.087568	4.89688	0.359487	4.27008	0.691324	0.032262	0
P13	Pathogen Detection	H. parainfluenzae
P14	NP	0.103167	0.467546	0.00439	0.129508	0.052681	0	0.01756	79.6014	0.353403	3.37599	0.116337	3.66135	2.3531	0.00878	0
P14	OP	0.164593	0.515724	0.12948	0.111923	0.050475	0.006584	0.002195	6.73953	0.175566	11.3942	0.127286	1.03364	0.243597	2.68835	0
P14	Pathogen Detection	EBV
P15	NP	0.651747	0.597794	0.03453	0.809288	0.023739	0.893454	0.002158	15.3592	0.047478	1.41572	3.70546	0.416514	0.209336	0.002158	0
P15	OP	0.238429	0.223117	0.010937	4.72701	0.38936	0.231866	0.002187	2.8677	0.056873	35.6987	1.64494	2.97051	20.4458	0.00875	0
P15	Pathogen Detection	M. pneumoniae+S. pneumoniae
P16	NP	0.772589	0.024252	0.06929	0.72755	0.838415	0.024252	0	3.00721	0.027716	1.29227	22.0309	1.11904	0.39842	0.578575	0
P16	OP	0.231318	0.002142	0	0.402664	1.66634	0.006425	0	5.03973	0.062113	17.3189	1.30223	11.9878	4.44002	1.02165	0
P16	Pathogen Detection	S. pneumoniae+M. catarrhalis+EBV
P17	NP	0.295754	0.28261	0.017526	0.942032	0.008763	0.302327	0.024098	82.5264	0.035052	3.21825	1.89283	0.560838	0.490733	0.122683	0
P17	OP	36.4987	0.413362	0.01564	0.62116	0.113954	0.339627	0.002234	3.18847	0.151938	10.4413	0.279298	9.57658	3.93476	0.002234	0
P17	Pathogen Detection	CMV
P18	NP	0.011608	0.002322	0.004643	0.039467	0.053396	0.002322	0.004643	8.41575	0.055718	4.28333	52.8347	5.12606	0.617542	0.178762	0
P18	OP	0.016103	0.922496	0	0.069015	0.057512	0.0023	0.006901	23.6812	0.071315	14.9992	0.404883	20.0925	0.174837	0.009202	0
P18	Pathogen Detection	Unknown
P19	NP	0.285775	0.862008	0.091354	0.594973	0.161627	0.002342	0.021082	64.9528	0.27172	2.66567	6.76255	1.68888	0.468483	0.039821	0
P19	OP	0.143364	0.529346	0.008822	0.194093	1.04325	0.008822	0.004411	4.46856	0.322019	19.0167	0.189684	5.38389	3.91275	0.01985	0
P19	Pathogen Detection	Unknown
P20	NP	0	0	0	0.006934	0.004623	0.039295	0.020803	67.9811	0.030049	0.436873	0.071655	0.166428	0.087837	0.004623	0
P20	OP	1.11679	0.272498	0	0.008934	0	0	0.004467	2.65797	0.20549	5.82297	0.049139	7.6277	43.4299	0	0
P20	Pathogen Detection	Unknown
P21	NP	0.228272	0.06728	0.009611	0	0.002403	0	0.002403	2.19862	0.021626	0.790542	0.007209	0.819377	1.63635	0	0
P21	OP	0.191688	0.181156	0.004213	0.389695	0.033703	0.181156	0	1.10589	1.54825	53.719	0.444462	19.2889	2.86268	0.004213	0
P21	Pathogen Detection	M. pneumoniae+C. pneumoniae+AdV
P22	NP	0.015913	0.005304	0.010609	0.278478	0.090174	0	0.015913	73.0699	0.013261	1.4746	1.37382	0.604694	0.116695	0.230739	0
P22	OP	0	0	0.004513	0.051895	0.121841	0	0.002256	2.53384	0.446751	35.4671	0.424188	6.85244	9.63448	0.144404	0
P22	Pathogen Detection	M. pneumoniae
P23	NP	0.054503	0.590813	0.045782	0.032702	0.224553	0	0	3.10013	0.159149	7.87678	57.5966	7.98797	2.31311	0.749961	0
P23	OP	0.035967	0.306918	0.014387	0.009591	0.002398	0	0.002398	7.11905	0.263757	13.2958	0.995085	17.0004	1.15574	0.513128	0
P23	Pathogen Detection	M. pneumoniae+S. pneumoniae+C. pneumoniae+GAS+EBV
P24	NP	1.71083	0.012065	0.02413	0.511558	0.772164	2.60123	0.016891	78.1116	0.007239	0.76975	0.84938	0.965204	0.24854	0.197867	0.045847
P24	OP	0.341044	0.00696	0.00464	0.624086	1.21337	0.327123	0.00232	6.47983	0.554486	16.0615	0.939609	7.7628	3.64476	1.00921	0
P24	Pathogen Detection	EBV
P25	NP	0.08821	0.002151	0.012909	0.292599	0.098967	0.07315	0.027969	88.4402	0.01506	0.948795	0.14845	1.45224	0.208692	0.537865	0
P25	OP	0.150112	0.002309	0	0.083139	0.845246	0.025404	0	2.50802	0.103924	10.9559	0.450335	11.6718	13.293	0.519618	0
P25	Pathogen Detection	M. pneumoniae+S. pneumoniae
P26	NP	0.10989	0.421619	0.017941	0.125589	0.038125	0.011213	0.035882	89.0469	0.190626	0.93743	0.614487	0.621216	0.168199	0.017941	0
P26	OP	0.079934	0.313256	0	0.16851	0.617871	0.004321	0.00216	5.02074	0.229001	6.29321	0.142586	6.61294	14.7187	0.015123	0
P26	Pathogen Detection	S. aureus+EBV
P27	NP	8.11478	0.637928	0.049402	2.79657	0.034366	40.1486	0	4.83923	0.017183	0.899972	4.12398	0.289967	0.189016	0.008592	0.012887
P27	OP	0.642255	0.706942	0.032344	4.35486	1.01652	2.81391	0.00231	7.21728	0.226406	22.7908	2.77925	4.16773	3.21821	0.034654	0
P27	Pathogen Detection	M. pneumoniae+H. influenzae+S. pneumoniae
P28	NP	0.139767	0.479201	0.006656	0.133111	0.048808	0.006656	0.035496	73.7704	0.357182	4.2995	0.126457	4.82307	0.439268	0.146424	0
P28	OP	0.227231	0.720712	0.009181	0.30986	0.098696	0.004591	0	7.78094	11.5475	19.6956	0.44069	3.11926	0.532501	0.275431	0
P28	Pathogen Detection	M. pneumoniae+S. aureus+A. baumannii+GAS
P29	NP	0.187827	0.006708	0.109566	0.160995	0.500872	0.004472	0.029068	80.1842	0.062609	2.54908	0.418138	2.36573	1.00174	0.505344	0
P29	OP	0.143482	0	0	0.210595	0.678068	0.002314	0.004628	18.5971	0.155053	10.009	0.617897	45.0071	3.90178	0.370276	0
P29	Pathogen Detection	M. pneumoniae
P30	NP	0.147158	0.921211	0.29726	0.061807	0.082409	0.002943	0.023545	25.2023	0.038261	3.11976	1.44509	1.79239	1.25379	0.453248	0
P30	OP	1.69707	6.95776	0.133803	0.062441	0.071362	0.00669	0.00669	3.18005	1.32911	37.9733	1.85763	4.62067	2.18322	0.486151	0
P30	Pathogen Detection	EBV
P31	NP	0.178306	2.0675	0.392698	0.154956	0.101889	0.044577	0.019104	72.0378	0.046699	2.79346	0.044577	3.89726	0.371471	0.010613	0
P31	OP	2.2825	81.2199	0.354625	0.245014	0.19773	0.034388	0	3.14004	0.023642	1.43784	0.017194	0.808116	0.260058	0	0.004298
P31	Pathogen Detection	M. catarrhalis
P32	NP	0.169075	0.011272	0.013526	0.247977	0.211907	0.011272	0.013526	63.5046	0.01578	0.674046	0.256994	0.949075	0.324624	25.1065	0
P32	OP	0.057037	0.17111	0.105623	0.033799	0.18801	0.021125	0	1.04567	0.954835	10.4187	0.071823	40.6206	0.454181	0.006337	0
P32	Pathogen Detection	M. pneumoniae
P33	NP	0.130887	0.809119	0.387902	0.019038	0.033317	0.00476	0.00476	20.4184	0.083292	8.24588	2.03232	2.31551	1.6349	14.5118	0
P33	OP	0.108719	1.57642	0.106355	1.92858	0.132353	0	0.011817	16.2913	0.144171	10.9971	2.81251	4.12186	3.08431	8.48479	0
P33	Pathogen Detection	M. pneumoniae
P34	NP	0.077428	0.257333	0.138914	0.30971	0.1002	0.027327	0.022773	85.9218	0.038714	1.9744	0.018218	1.43241	0.266442	0.054655	0
P34	OP	0.252981	2.74765	0.351362	3.9376	0.33028	0.028109	0.00937	32.2105	1.41482	10.9906	0.224872	12.9746	0.812818	0.074957	0.002342
P34	Pathogen Detection	M. pneumoniae+S. pneumoniae
P35	NP	0.08127	0.002196	0.002196	0.010982	0.085663	1.38819	0.028554	79.6099	0.050519	0.434907	0.103235	0.467854	0.127397	0.142772	0
P35	OP	0.145532	0.00441	0.00441	0.048511	0.202862	0.002205	0.00882	24.758	0.231527	5.52579	1.28994	15.7174	3.49717	0.904059	0
P35	Pathogen Detection	M. pneumoniae+EBV
P36	NP	0.10505	0.432136	0.023874	0.138474	0.059687	0.002387	0.02865	92.5272	0.131312	0.756834	0.059686	0.632685	0.148024	0.007162	0
P36	OP	3.40096	62.5468	0.05214	0.334171	0.246481	0.00711	0.00948	5.79466	0.372091	6.54832	0.12087	2.44347	1.14234	0.01185	0
P36	Pathogen Detection	M. pneumoniae
P37	NP	2.01914	0.981493	0.659212	0.712925	0.168465	3.92841	0.017091	47.8075	0.048831	0.986377	0.693394	1.06451	0.190439	0.004883	0.141608
P37	OP	0.246967	0.675528	0.399506	0.46488	0.363187	0.469722	0.004842	7.47681	0.44551	19.5153	0.542359	18.1037	2.77717	0.033897	0.002421
P37	Pathogen Detection	C. pneumoniae
P38	NP	0.330463	0.748601	0.015736	0.038217	0.343952	0.013488	0.026977	78.8346	0.029225	2.17162	0.382168	3.172	0.445114	0.586741	0
P38	OP	63.7595	0.989959	0.007054	0.387989	2.53486	0.011757	0.004703	7.45409	0.03292	7.05905	0.326851	1.41322	0.644297	0.315094	0
P38	Pathogen Detection	Unknown
P39	NP	0.086017	0.222212	0.026283	0.100354	0.243716	0.814776	0.035841	89.0447	0.088407	0.855395	0.043009	0.537609	0.181592	0.009557	0
P39	OP	0.154906	0.644321	0.006735	0.260423	2.88261	0	0.002245	10.6841	0.336753	21.4153	0.246952	5.48683	4.2184	0.065106	0
P39	Pathogen Detection	M. catarrhalis
P40	NP	1.21246	0.011123	0.011123	0.493882	0.115684	3.19911	0.031146	77.8265	0.015573	1.13237	0.938822	0.976641	0.189099	0.011123	0.031146
P40	OP	0.009278	0.004639	0.00232	0.392002	0.241232	0.327055	0.020876	34.6864	0.419837	9.94155	1.07627	6.23492	1.65151	0.071906	0
P40	Pathogen Detection	M. pneumoniae+C. pneumoniae
P41	NP	0.41244	1.25628	0.014222	2.38219	0.310515	0.011852	0.018963	61.271	0.391106	4.93505	0.151701	2.59078	0.981321	2.81597	0
P41	OP	0.125168	0.464568	0.007221	0.426054	0.091469	0.004814	0.004814	14.8541	0.257558	6.61467	1.78846	13.9755	0.324957	0.021664	0
P41	Pathogen Detection	M. pneumoniae+C. pneumoniae
P42	NP	0.098174	0.907127	0.102101	0.023562	0.047124	0.003927	0.015708	22.0067	0.522285	4.04084	7.95602	1.93992	1.44119	0.486943	0
P42	OP	0.017413	0.326499	0.030473	0.01306	0.750947	0	0.002177	1.83492	0.124069	11.8345	1.06656	4.56663	12.679	0.235079	0
P42	Pathogen Detection	M. pneumoniae+S. haemolyticus+EBV
P43	NP	0	0.002467	0.002467	0.160375	0.044412	0	0.041944	95.6255	0.007402	0.323217	0.199851	0.772267	0.170244	0	0
P43	OP	0	0.011966	0.004786	0.354186	0.263246	0	0	2.33332	0.062222	3.23553	0.794523	17.0751	1.62255	0.007179	0
P43	Pathogen Detection	M. pneumoniae
P44	NP	0.213568	0.306721	0.077248	60.0968	0.04544	0.552097	0.01136	9.46517	0.047712	4.74622	0.2272	2.29245	0.656609	0.324897	0
P44	OP	0.444265	0.394902	0.01795	1.57512	0.572159	0.536259	0	3.48905	0.255789	11.7887	0.585623	5.49497	2.62969	0.096482	0
P44	Pathogen Detection	M. pneumoniae+C. pneumoniae+EBV
P45	NP	1.25731	1.07399	0.004313	0.202722	0.26095	0	0.036662	76.4843	0.028036	2.53186	0.26095	0.918717	0.383877	0.00647	0
P45	OP	0.004465	0	0	0.631866	0.631866	0	0.006698	3.77556	0.133964	30.0505	0.419755	14.8209	1.65	0.104939	0
P45	Pathogen Detection	M. pneumoniae+M. catarrhalis+EBV
P46	NP	0.052733	0.183509	0.139214	0.386003	0.048514	8.21574	0.021093	80.3054	0.042186	1.19598	0.021092	1.57143	0.21093	0.130777	0
P46	OP	0.140024	0.270866	0.19282	0.482049	1.95115	0.123956	0.004591	14.2205	0.642733	18.575	0.465981	18.7862	8.05252	0.061978	0
P46	Pathogen Detection	M. catarrhalis
P47	NP	0.209831	0.473889	0.426736	0.12024	0.084876	0.172109	0.004715	2.32229	0.04008	0.424378	0.473889	0.881764	0.073087	0.004715	0
P47	OP	0.117788	0.26669	0.166681	0.260023	0.508934	0.020002	0.011112	30.5383	0.175571	17.6971	0.240021	12.6478	7.86737	0.015557	0
P47	Pathogen Detection	EBV
P48	NP	0.468204	0.025623	1.93571	0.03727	0.288842	0.002329	0.027952	74.9779	0.013976	4.77289	0.391333	1.13906	0.40997	0.395994	0
P48	OP	0.202658	0	0	0.39589	5.9902	0	0	3.1954	0.09426	7.34989	0.327551	1.8687	3.41455	0.292204	0
P48	Pathogen Detection	M. pneumoniae
P49	NP	0.362941	0.373679	0.498239	1.47754	0.365089	0.339318	0.032214	75.9428	0.07087	3.49197	0.266301	1.53123	1.03299	0.006443	0
P49	OP	0.245596	0.234433	0.004465	1.00918	0.366161	0.272388	0	4.93872	2.69486	18.8685	0.669807	16.3813	12.3691	0.008931	0
P49	Pathogen Detection	Unknown
P50	NP	0.043062	0.358098	0.027197	0.135987	0.018132	0	0.036263	78.079	0.067993	3.98214	2.6472	3.93908	1.11962	0.285572	0
P50	OP	0.035382	0.815993	0.026536	0.03317	0.785034	0	0.019902	56.7546	0.099511	7.32403	2.03888	4.6129	2.64258	0.451118	0
P50	Pathogen Detection	M. pneumoniae+EBV
P51	NP	0.166035	0.398059	0.268211	0.083018	0.061731	0.157521	0.03193	86.119	0.025544	0.911065	0.757802	0.842948	0.170292	0.021287	0
P51	OP	0.0552	0.167901	0.110401	0.0414	0.379502	0.023	0	1.81471	0.312802	8.64805	0.069	5.84434	2.36441	0	0
P51	Pathogen Detection	M. pneumoniae+H. influenzae
P52	NP	0.029299	0.830132	0.07813	0.048831	0.03581	0.003255	0.045576	68.3866	0.084641	5.22495	1.9793	4.07904	2.00534	0.553421	0
P52	OP	0.033688	0.582319	0.028875	0.026469	0.045719	0.002406	0.002406	5.60662	0.151595	9.59863	3.13778	12.7316	9.34838	0.644882	0
P52	Pathogen Detection	M. pneumoniae+EBV
P53	NP	0.096596	0.016492	0.044764	0.0589	0.042408	0.1178	0	7.26587	0.01178	1.03192	1.19213	0.636117	0.157851	0.054188	0
P53	OP	0.002391	0.002391	0.004781	0.023906	0.035859	0.002391	0	2.54363	0.066938	7.10256	0.284488	1.41286	0.482907	0.009563	0
P53	Pathogen Detection	M. pneumoniae+EBV
P54	NP	0.006481	0.00216	0	0.043204	0.270025	0	0.025922	76.3544	0.015121	3.52329	0.200898	1.03906	0.611337	0.010801	0
P54	OP	0.002196	0	0.002196	0.382191	0.028554	0.074681	0.015375	39.3085	0.173523	10.1105	0.127396	17.9146	0.944494	0.138379	0
P54	Pathogen Detection	M. pneumoniae+EBV
P55	NP	0.589387	0.006672	0.013345	0.100085	0.836262	0.095636	0.020017	30.2011	0.011121	0.707264	1.15431	0.765091	0.280237	0.200169	0
P55	OP	0.14606	0.002318	0.004637	0.308349	10.8826	0.006955	0.011592	3.67004	0.303712	17.9399	0.498458	13.361	4.34006	0.459045	0
P55	Pathogen Detection	Unknown
P56	NP	0.027864	0.50583	0.030007	0.109311	0.021433	0	0.015003	36.319	0.122171	4.9447	32.1459	7.49314	1.5625	1.35459	0
P56	OP	0.394546	0.819442	0.361862	3.65597	0.226456	0.004669	0	6.6746	0.413223	38.9644	0.338517	6.02325	4.17192	0.025681	0
P56	Pathogen Detection	M. pneumoniae
P57	NP	0.227054	0	0.004587	0.282097	0.325673	0.00688	0	4.04339	0.05963	6.12357	66.1438	1.66506	0.486216	1.11233	0
P57	OP	1.49669	0.004454	0.004454	0.118043	0.409809	0.002227	0	2.25617	0.385309	2.5279	0.29622	29.8292	5.14933	0.271721	0
P57	Pathogen Detection	M. pneumoniae+C. pneumoniae+EBV
P58	NP	0.008653	1.56179	0.002163	1.23948	0.18603	0.002163	0.021631	71.8402	0.118973	3.94557	0.804689	4.20732	0.348266	0.090852	0.004326
P58	OP	0.009014	0.004507	0.103662	0.16	7.45014	0.002254	0.004507	11.8625	0.367324	19.671	0.310988	11.8468	6.09803	0.022535	0
P58	Pathogen Detection	EBV
P59	NP	0.005071	0.007606	0.005071	5.09888	0.0786	0.002535	0.005071	9.19878	0.025355	1.81542	63.6182	3.70436	0.436105	0.002535	0
P59	OP	0	0.027709	0	0.281703	0.992888	0	0.002309	5.56248	0.136233	5.97118	0.528771	9.66103	4.76817	0.002309	0
P59	Pathogen Detection	H. influenzae+S. pneumoniae
P60	NP	0.052575	0.187441	0.070862	2.79333	0.043432	0.025145	0.029716	85.071	0.020573	0.56461	0.018287	0.678904	0.121151	2.66075	0
P60	OP	0.003395	0.030557	0.003395	33.2903	1.81985	0	0.003395	8.09086	0.190133	8.86837	1.19512	5.04533	3.70081	1.91831	0
P60	Pathogen Detection	H. influenzae

## Sheet: Supplementary Table S6
Comparison of Mycoplasma species in NP								Comparison of Mycoplasma species in OP
Species	MPP		nonMPP		p.value	q.value		Species	MPP		nonMPP		p.value	q.value
	MEAN	SD	MEAN	SD					MEAN	SD	MEAN	SD
M. faucium	0.00032	0.001017	0.001233	0.002539	0.151553	0.19		M. faucium	0.001097	0.003763	9e-05	0.000439	0.068467	0.26
M. pneumoniae	1.70922	5.24173	0.20688	0.544422	0.091294	0.19		M. pneumoniae	0.480735	1.55595	0.349719	0.687382	0.103935	0.26
M. salivarium	0.001228	0.003557	0.009817	0.031717	0.121164	0.19		M. salivarium	0.016346	0.075353	0.006041	0.019768	0.711696	0.972
M. sualvi	0.005694	0.01641	0.00393	0.012701	0.880974	0.881		M. sualvi	0.002877	0.01132	0.002271	0.007018	0.829653	0.972
M. testudinis	0.221957	0.91585	0.009095	0.024658	0.143723	0.19		M. testudinis	0.040624	0.141031	0.015391	0.042406	0.971686	0.972
Species	MPP		Health		p.value	q.value		Species	MPP		Health		p.value	q.value
	MEAN	SD	MEAN	SD					MEAN	SD	MEAN	SD
M. faucium	0.00032	0.001017	0.005179	0.039782	0.076586	0.0924		M. faucium	0.001097	0.003763	0	0	0.000336	0
M. muris	0	0	0.00108	0.004691	0.157298	0.157		M. muris	NA	NA	NA	NA	NA	NA
M. pneumoniae	1.70922	5.24173	0.030607	0.235099	0	0		M. pneumoniae	0.480735	1.55595	0.00036	0.002768	0	0
M. salivarium	0.001228	0.003557	0.003169	0.023419	0.029583	0.045		M. salivarium	0.016346	0.075353	0.000986	0.003231	0.001408	0.00125
M. sualvi	0.005694	0.01641	0	0	9.7e-05	0		M. sualvi	0.002877	0.01132	0	0	0.003853	0.004
M. testudinis	0.221957	0.91585	0	0	2.8e-05	0		M. testudinis	0.040624	0.141031	0	0	9.7e-05	0
Species	nonMPP		Health		p.value	q.value		Species	nonMPP		Health		p.value	q.value
	MEAN	SD	MEAN	SD					MEAN	SD	MEAN	SD
M. faucium	0.001233	0.002539	0.005179	0.039782	0.000764	0.0015		M. faucium	9e-05	0.000439	0	0	0.123236	0.123
M. muris	0	0	0.00108	0.004691	0.198599	0.199		M. muris	NA	NA	NA	NA	NA	NA
M. pneumoniae	0.20688	0.544422	0.030607	0.235099	0	0		M. pneumoniae	0.349719	0.687382	0.00036	0.002768	0	0
M. salivarium	0.009817	0.031717	0.003169	0.023419	0.000212	0		M. salivarium	0.006041	0.019768	0.000986	0.003231	0.002352	0.0025
M. sualvi	0.00393	0.012701	0	0	1.8e-05	0		M. sualvi	0.002271	0.007018	0	0	0.001472	0.001667
M. testudinis	0.009095	0.024658	0	0	0.006269	0.0072		M. testudinis	0.015391	0.042406	0	0	7.9e-05	0

## Sheet: Supplementary Table S7
Group	Sample ID	NP						OP
		M. faucium	M. muris	M. pneumoniae	M. salivarium	M. sualvi	M. testudinis	M. faucium	M. pneumoniae	M. salivarium	M. sualvi	M. testudinis
MPP	P7	-	-	1	-	-	-	-	1	-	-	-
	P12	-	-	1	-	-	-	-	0.861109	0.138891	-	-
	P15	-	-	1	-	-	-	-	1	-	-	-
	P21	1	-	-	-	-	-	-	1	-	-	-
	P22	-	-	1	-	-	-	-	1	-	-	-
	P23	-	-	0.788991	-	0.00688036	0.204129	-	0.869919	-	-	0.130081
	P25	-	-	1	-	-	-	-	1	-	-	-
	P27	-	-	1	-	-	-	-	0.937507	0.0624932	-	-
	P28	-	-	1	-	-	-	-	1	-	-	-
	P29	-	-	1	-	-	-	-	1	-	-	-
	P32	-	-	1	-	-	-	-	0.374993	0.625007	-	-
	P33	-	-	0.936138	-	0.000307062	0.0635554	-	0.918394	0.000255771	0.00127907	0.0800716
	P34	0.0606113	-	0.727269	0.21212	-	-	-	0.155339	0.844661	-	-
	P35	-	-	1	-	-	-	-	1	-	-	-
	P36	-	-	0.750026	-	-	0.249974	-	1	-	-	-
	P40	-	-	0.833308	0.166692	-	-	0.0312559	0.968744	-	-	-
	P41	-	-	0.999159	-	-	0.000840921	-	0.243246	0.0540522	0.675675	0.0270261
	P42	-	-	0.765431	-	0.0123458	0.222223	-	0.830771	-	-	0.169229
	P43	-	-	-	-	1	-	-	0.75	-	-	0.25
	P44	-	-	0.993056	0.00694442	-	-	0.0222244	0.955551	0.0222244	-	-
	P45	-	-	1	-	-	-	0.142859	0.746031	0.11111	-	-
	P48	0.00584701	-	0.994153	-	-	-	0.00799837	0.992002	-	-	-
	P50	-	-	0.649485	0.0103095	0.113403	0.226803	-	0.772727	-	0.0113635	0.21591
	P51	-	-	0.666677	0.333323	-	-	-	-	1	-	-
	P52	-	-	0.732759	-	0.0991384	0.168103	0.002865	0.767908	0.00573119	0.00573119	0.217765
	P53	-	-	1	-	-	-	0.142874	0.571437	0.285689	-	-
	P54	-	-	1	-	-	-	-	1	-	-	-
	P56	-	-	0.216884	-	0.00102951	0.782087	-	0.916655	0.0833452	-	-
	P57	-	-	1	-	-	-	-	1	-	-	-
non- MPP	P1	-	-	1	-	-	-	-	1	-	-	-
	P3	-	-	0.83331	0.16669	-	-	-	0.333385	-	0.666615	-
	P4	-	-	1	-	-	-	-	1	-	-	-
	P5	-	-	0.909091	-	0.0909091	-	-	0.0625108	0.0625108	0.874978	-
	P6	-	-	0.756579	-	-	0.243421	-	0.81117	-	0.00265912	0.186171
	P8	-	-	1	-	-	-	-	0.666716	0.333284	-	-
	P9	-	-	0.399962	0.600038	-	-	-	0.333333	0.666667	-	-
	P10	-	-	1	-	-	-	-	1	-	-	-
	P11	-	-	0.788462	-	0.0192307	0.192307	-	0.75862	-	0.0459766	0.195403
	P13	0.0909082	-	0.681816	0.227276	-	-	-	0.250002	0.749998	-	-
	P14	-	-	1	-	-	-	-	0.999184	-	-	0.00081582
	P16	0.0059532	-	0.994047	-	-	-	-	1	-	-	-
	P17	-	-	0.982454	-	0.0175457	-	-	1	-	-	-
	P24	-	-	1	-	-	-	-	0.997706	0.00229356	-	-
	P26	-	-	1	-	-	-	-	1	-	-	-
	P30	0.0107521	-	0.827958	-	0.0322581	0.129032	-	0.798535	-	-	0.201465
	P31	-	-	0.384599	0.615401	-	-	0.5	-	0.5	-	-
	P37	-	-	0.222217	0.666651	0.111131	-	-	0.777775	0.222225	-	-
	P39	0.42858	-	0.57142	-	-	-	-	0.87879	0.0606052	-	0.0606052
	P46	0.0144907	-	0.898552	0.0724671	0.0144907	-	-	0.771427	0.228573	-	-
	P47	-	-	1	-	-	-	-	0.875021	0.124979	-	-
	P58	0.00869509	-	0.365218	0.626087	-	-	-	1	-	-	-
	P59	-	-	0.0399924	-	0.960008	-	-	1	-	-	-
	P60	-	-	0.997429	0.00257084	-	-	-	0.998233	-	-	0.00176666
unknown	P2	-	-	-	-	-	-	-	1	-	-	-
	P18	-	-	1	-	-	-	-	1	-	-	-
	P19	-	-	0.944454	-	-	0.0555463	-	1	-	-	-
	P20	-	-	1	-	-	-	-	-	-	-	-
	P38	-	-	1	-	-	-	-	1	-	-	-
	P49	-	-	1	-	-	-	-	1	-	-	-
	P55	-	-	1	-	-	-	-	1	-	-	-
Health	H1	-	-	-	-	-	-	-	-	-	-	-
	H2	-	-	-	-	-	-	-	-	-	-	-
	H3	-	-	-	-	-	-	-	-	-	-	-
	H4	-	-	-	-	-	-	-	-	-	-	-
	H5	-	-	-	-	-	-	-	-	-	-	-
	H6	-	-	-	-	-	-	-	-	-	-	-
	H7	-	-	-	-	-	-	-	-	-	-	-
	H8	-	-	-	-	-	-	-	-	-	-	-
	H9	-	-	-	-	-	-	-	-	-	-	-
	H10	-	-	-	-	-	-	-	-	-	-	-
	H11	-	-	-	-	-	-	-	-	-	-	-
	H12	-	-	-	-	-	-	-	-	-	-	-
	H13	-	-	-	-	-	-	-	-	-	-	-
	H14	-	-	-	-	-	-	-	-	-	-	-
	H15	-	-	-	-	-	-	-	-	-	-	-
	H16	-	-	-	-	-	-	-	-	-	-	-
	H17	-	-	-	-	-	-	-	-	-	-	-
	H18	-	-	-	-	-	-	-	-	-	-	-
	H19	-	-	-	-	-	-	-	-	-	-	-
	H20	-	-	-	-	-	-	-	-	-	-	-
	H21	-	-	-	-	-	-	-	-	1	-	-
	H22	-	-	-	-	-	-	-	-	-	-	-
	H23	-	-	-	-	-	-	-	-	-	-	-
	H24	-	-	-	-	-	-	-	-	1	-	-
	H25	-	-	-	-	-	-	-	-	-	-	-
	H26	-	-	-	-	-	-	-	-	-	-	-
	H27	-	-	-	-	-	-	-	-	-	-	-
	H28	-	-	-	-	-	-	-	-	-	-	-
	H29	-	-	-	-	-	-	-	-	-	-	-
	H30	-	-	-	-	-	-	-	-	-	-	-
	H31	-	-	-	-	-	-	-	-	-	-	-
	H32	-	-	-	-	-	-	-	-	-	-	-
	H33	-	1	-	-	-	-	-	-	-	-	-
	H34	-	-	-	-	-	-	-	-	-	-	-
	H35	-	-	-	-	-	-	-	-	-	-	-
	H36	-	-	-	1	-	-	-	-	1	-	-
	H37	-	-	-	-	-	-	-	-	-	-	-
	H38	-	-	-	-	-	-	-	-	-	-	-
	H39	-	-	-	-	-	-	-	-	-	-	-
	H40	-	-	-	-	-	-	-	-	-	-	-
	H41	-	-	-	-	-	-	-	-	-	-	-
	H42	-	-	-	-	-	-	-	-	-	-	-
	H43	-	-	-	-	-	-	-	-	-	-	-
	H44	-	1	-	-	-	-	-	-	1	-	-
	H45	-	-	-	-	-	-	-	-	-	-	-
	H46	-	1	-	-	-	-	-	-	-	-	-
	H47	-	-	-	-	-	-	-	-	-	-	-
	H48	-	-	-	-	-	-	-	-	-	-	-
	H49	0.934782	0.0434795	-	0.0217382	-	-	-	-	-	-	-
	H50	-	-	-	-	-	-	-	-	1	-	-
	H51	-	-	-	-	-	-	-	-	1	-	-
	H52	-	-	-	-	-	-	-	-	-	-	-
	H53	-	-	-	-	-	-	-	-	-	-	-
	H54	-	-	-	-	-	-	-	-	-	-	-
	H55	-	-	-	-	-	-	-	-	-	-	-
	H56	-	-	-	-	-	-	-	-	-	-	-
	H57	-	-	-	-	-	-	-	-	-	-	-
	H58	-	-	-	-	-	-	-	-	-	-	-
	H59	-	-	1	-	-	-	-	1	-	-	-
